# Supplementary material for: 志水宏吉[編著], 『教育のエスノグラフィー-学校現場のいま-』, A5判, 350頁, 2,700円, (本体), 嵯峨野書院
Source: Royal Society of Chemistry journal article supplement (doi:10.1039/b917140a), 1999-05-15
Supplement: b917140a.pdf [file b917140a.pdf]

## **Carbamate complexation by urea-based receptors: studies in solution and the solid state**

**Peter. R. Edwards, Jennifer. R. Hiscock, Philip. A. Gale\* and Mark E. Light**

### **Supplementary Information**

**General Remarks:**  $^1\text{H}$  NMR (300MHz) spectra were determined on a Bruker AV300 spectrometer. Chemical shifts are reported in parts per million (ppm) calibrated to the solvent peak set.

**Formation of receptor:guest complexes:** A 0.01M solution of each receptor was prepared in DMSO- $d_6$ , and the  $^1\text{H}$  NMR spectrum acquired.

Subsequently either,

- a) 1,3-diaminopropane, (1eq, 0.01M, 0.73 mg/mL, 0.8  $\mu\text{L}/\text{mL}$ ),
- b) n-butylamine, (2eq, 0.02M, 1.46 mg/mL, 2.0  $\mu\text{L}/\text{mL}$ ),
- c) 1,3-diaminopropane, (1eq, 0.01M, 0.73 mg/mL, 0.8  $\mu\text{L}/\text{mL}$ ) and 18-crown-6, (1eq, 0.01M, 2.64mg/mL),
- d) n-butylamine, (2eq, 0.02M, 1.46mg/mL, 2.0 $\mu\text{L}/\text{mL}$ ) and 18-crown-6, (1eq, 0.01M, 2.64mg/mL), or,
- e) 1,4,5,6-tetrahydropyrimidine, (1eq, 0.01M, 0.84mg/mL).

were added to the solution of receptor.

Carbon dioxide was bubbled through each solution for 3 minutes. After this time, a second  $^1\text{H}$  NMR spectrum was acquired. The chemical shift change for each urea NH proton was calculated accordingly. This process was repeated three times for each receptor in each case a-e.

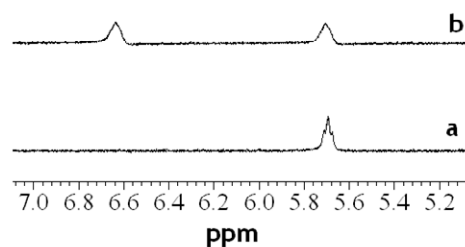

**Fig. S1** Representative <sup>1</sup>H NMR spectra of a) Receptor **1**, b) Receptor **1** + 2eq. n-butylamine bubbled with CO<sub>2</sub> for 3 minutes. Spectra in DMSO-*d*<sub>6</sub>.

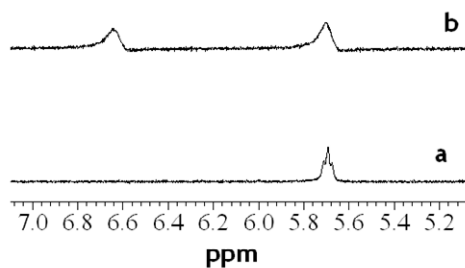

**Fig. S2** Representative <sup>1</sup>H NMR spectra of a) Receptor **1**, b) Receptor **1** + 1eq. 1,3-diaminopropane bubbled with CO<sub>2</sub> for 3 minutes. Spectra in DMSO-*d*<sub>6</sub>.

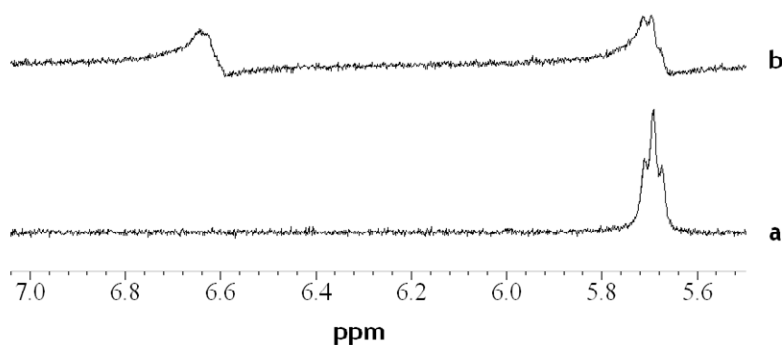

**Fig. S3** Representative <sup>1</sup>H NMR spectra of a) Receptor **1**, b) Receptor **1** + 2eq. n-butylamine, and 1eq. 18-crown-6, bubbled with CO<sub>2</sub> for 3 minutes. Spectra in DMSO-*d*<sub>6</sub>.

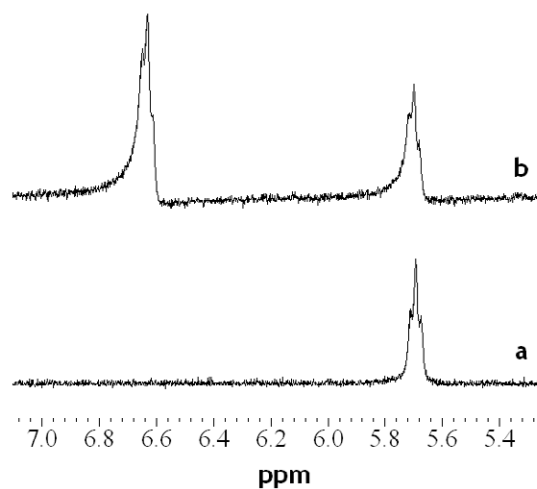

**Fig. S4** Representative <sup>1</sup>H NMR spectra of a) Receptor 1, b) Receptor 1 + 1 eq. 1,3-diaminopropane and 1 eq. 18-crown-6, bubbled with CO<sub>2</sub> for 3 minutes. Spectra in DMSO-*d*<sub>6</sub>.

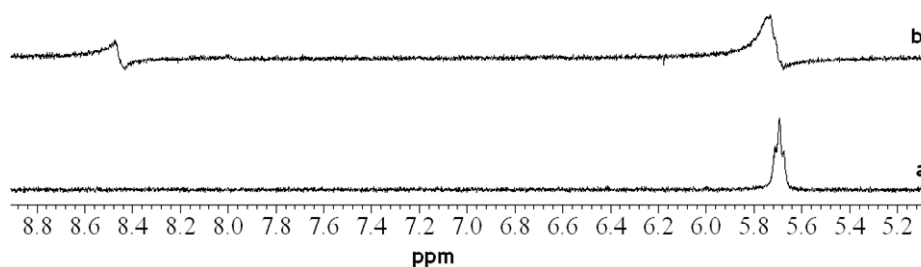

**Fig. S5** Proton NMR spectra of a) Receptor 1, b) Receptor 1 + 1 eq. 1,4,5,6-tetrahydropyrimidine, bubbled with CO<sub>2</sub> for 3 minutes. Spectra in DMSO-*d*<sub>6</sub>.

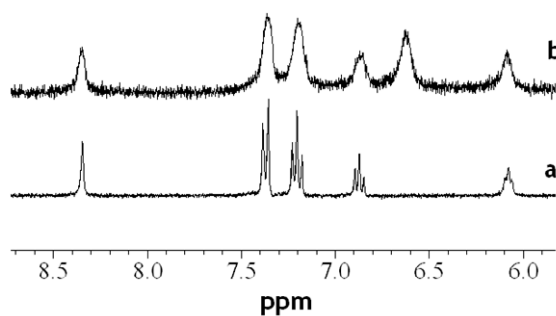

**Fig. S6** Representative <sup>1</sup>H NMR spectra of a) Receptor 2, b) Receptor 2 + 2 eq. n-butylamine bubbled with CO<sub>2</sub> for 3 minutes. Spectra in DMSO-*d*<sub>6</sub>.

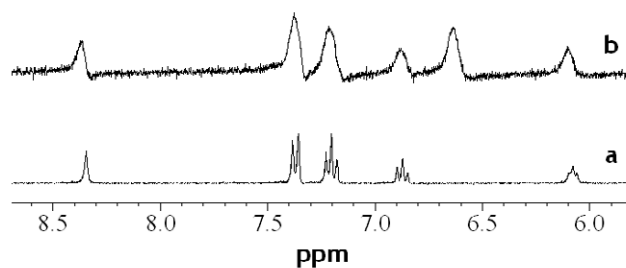

**Fig. S7** Representative <sup>1</sup>H NMR spectra of a) Receptor 2, b) Receptor 2 + 1eq. 1,3-diaminopropane bubbled with CO<sub>2</sub> for 3 minutes. Spectra in DMSO-*d*<sub>6</sub>.

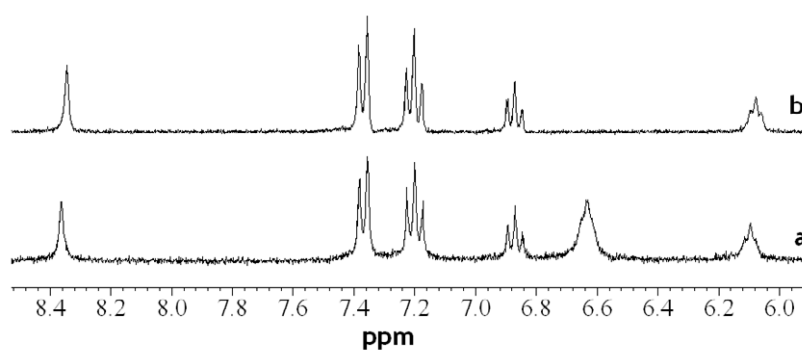

**Fig. S8** Representative <sup>1</sup>H NMR spectra of a) Receptor 2, b) Receptor 2 + 2eq. n-butylamine, and 1eq. 18-crown-6, bubbled with CO<sub>2</sub> for 3 minutes. Spectra in DMSO-*d*<sub>6</sub>.

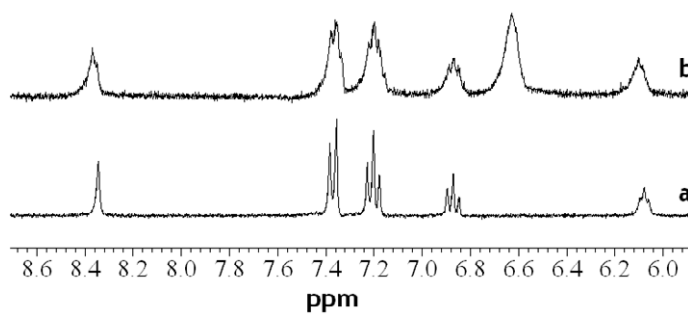

**Fig. S9** Representative <sup>1</sup>H NMR spectra of a) Receptor 2, b) Receptor 2 + 1eq. 1,3-diaminopropane and 1eq. 18-crown-6, bubbled with CO<sub>2</sub> for 3 minutes. Spectra in DMSO-*d*<sub>6</sub>.

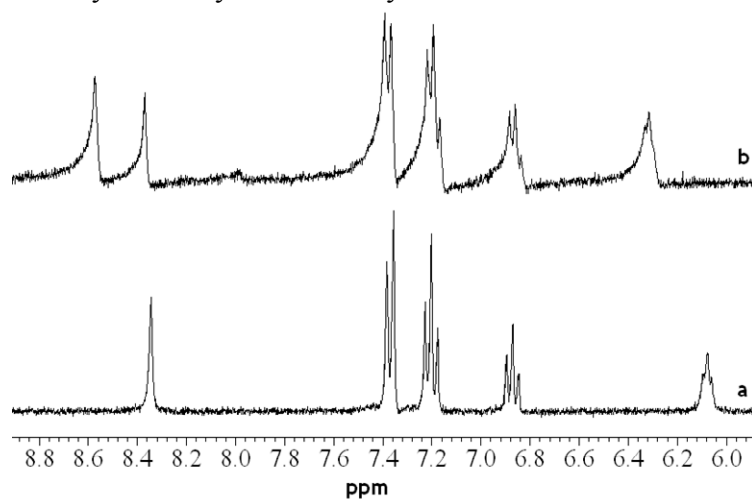

**Fig. S10** Proton NMR spectra of a) Receptor **2**, b) Receptor **2** + 1eq. 1,4,5,6-tetrahydropyrimidine, bubbled with CO<sub>2</sub> for 3 minutes. Spectra in DMSO-*d*<sub>6</sub>.

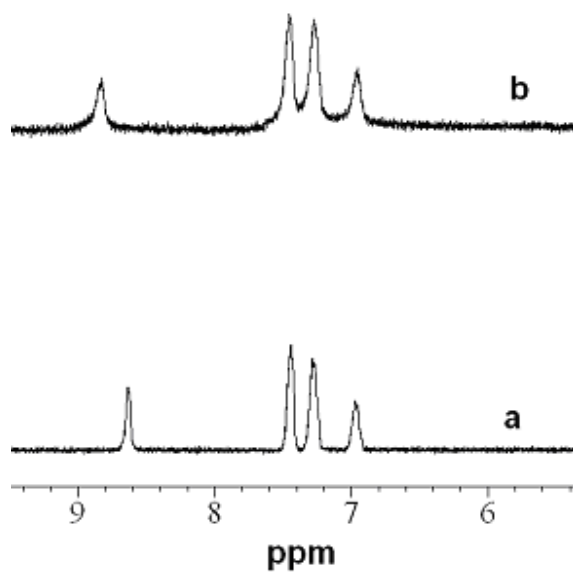

**Fig. S11** Representative <sup>1</sup>H NMR spectra of a) Receptor **3**, b) Receptor **3** + 2eq. n-butylamine bubbled with CO<sub>2</sub> for 3 minutes. Spectra in DMSO-*d*<sub>6</sub>.

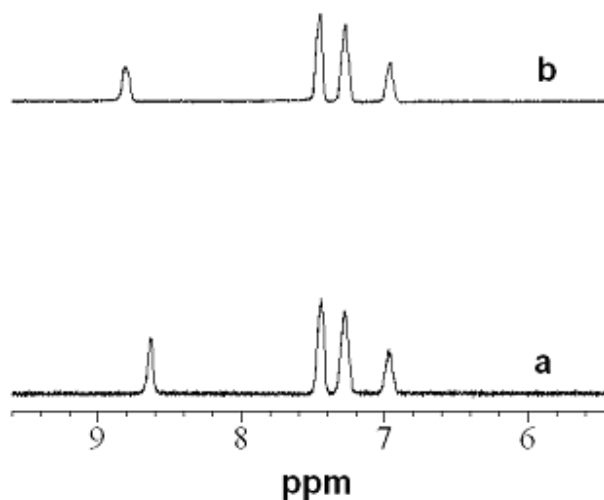

**Fig. S12** Representative <sup>1</sup>H NMR spectra of a) Receptor 3, b) Receptor 3 + 1 eq. 1,3-diaminopropane bubbled with CO<sub>2</sub> for 3 minutes. Spectra in DMSO-*d*<sub>6</sub>.

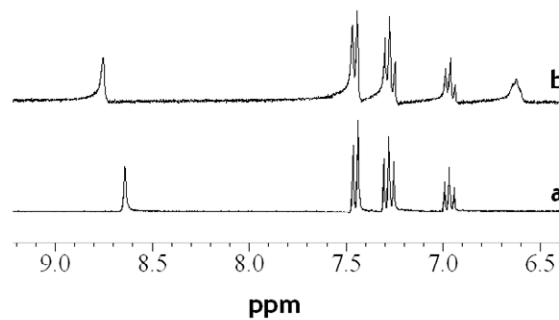

**Fig. S13** Representative <sup>1</sup>H NMR spectra of a) Receptor 3, b) Receptor 3 + 2 eq. n-butylamine, and 1 eq. 18-crown-6, bubbled with CO<sub>2</sub> for 3 minutes. Spectra in DMSO-*d*<sub>6</sub>.

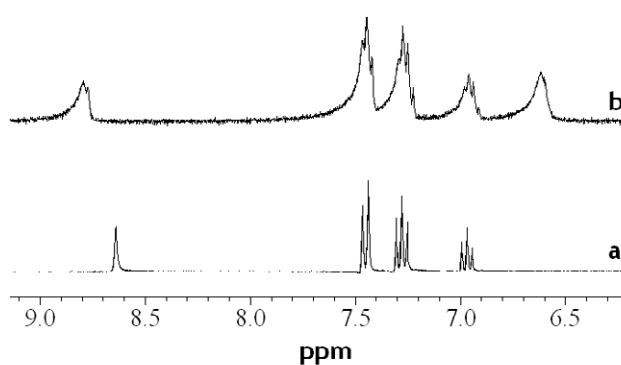

**Fig. S14** Representative <sup>1</sup>H NMR spectra of a) Receptor 3, b) Receptor 3 + 1 eq. 1,3-diaminopropane and 1 eq. 18-crown-6, bubbled with CO<sub>2</sub> for 3 minutes. Spectra in DMSO-*d*<sub>6</sub>.

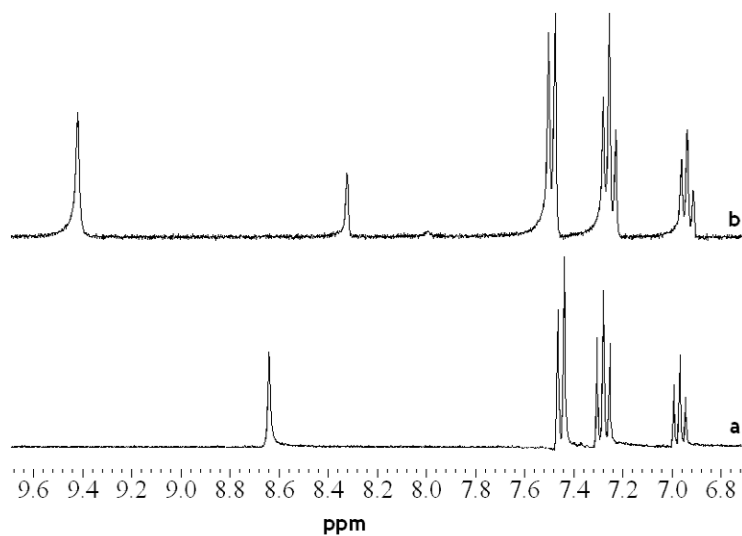

**Fig. S15** Proton NMR spectra of a) Receptor **3**, b) Receptor **3** + 1eq. 1,4,5,6-tetrahydropyrimidine, bubbled with CO<sub>2</sub> for 3 minutes. Spectra in DMSO-*d*<sub>6</sub>.

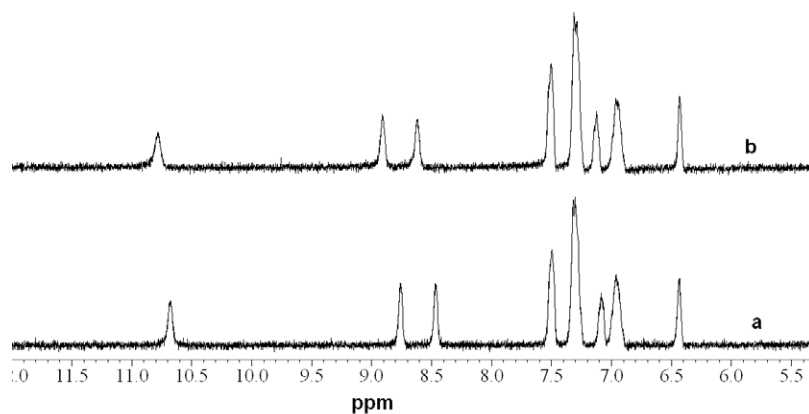

**Fig. S16** Representative <sup>1</sup>H NMR spectra of a) Receptor **4**, b) Receptor **4** + 2eq. n-butylamine bubbled with CO<sub>2</sub> for 3 minutes. Spectra in DMSO-*d*<sub>6</sub>.

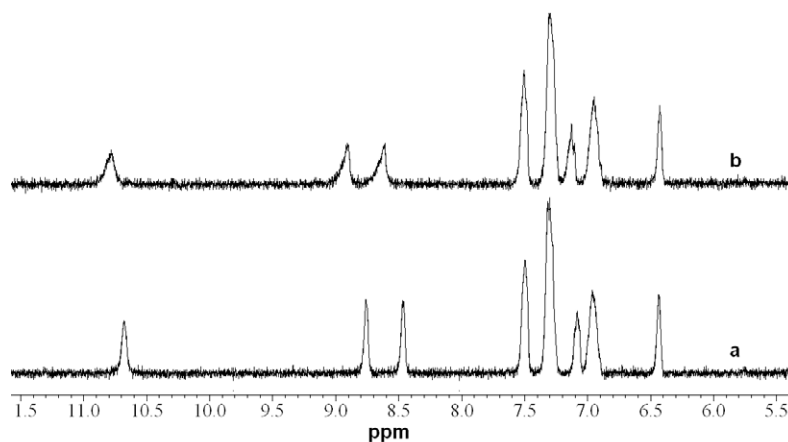

**Fig. S17** Representative  $^1\text{H}$  NMR spectra of a) Receptor **4**, b) Receptor **4** + 1eq. 1,3-diaminopropane bubbled with  $\text{CO}_2$  for 3 minutes. Spectra in  $\text{DMSO-}d_6$ .

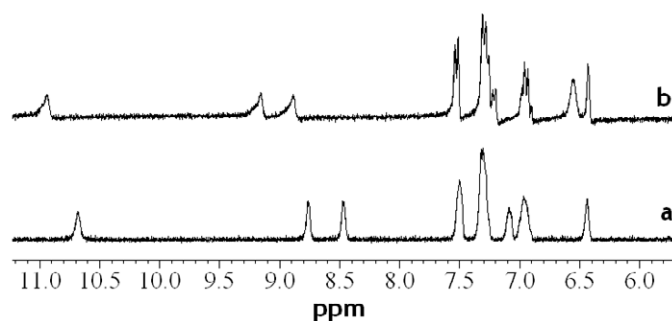

**Fig. S18** Representative  $^1\text{H}$  NMR spectra of a) Receptor **4**, b) Receptor **4** + 2eq. n-butylamine, and 1eq. 18-crown-6, bubbled with  $\text{CO}_2$  for 3 minutes. Spectra in  $\text{DMSO-}d_6$ .

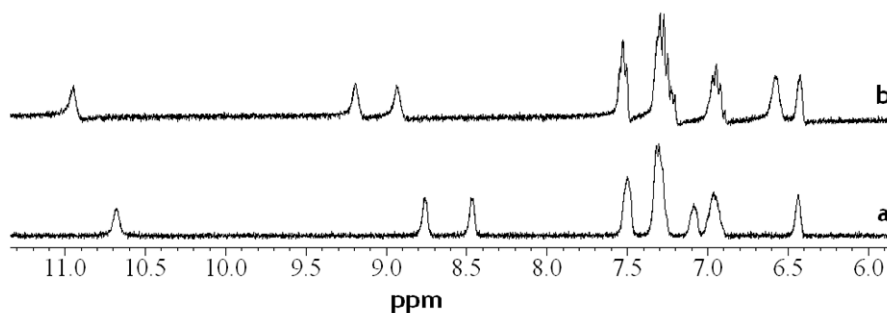

**Fig. S19** Representative  $^1\text{H}$  NMR spectra of a) Receptor **4**, b) Receptor **4** + 1eq. 1,3-diaminopropane and 1eq. 18-crown-6, bubbled with  $\text{CO}_2$  for 3 minutes. Spectra in  $\text{DMSO-}d_6$ .

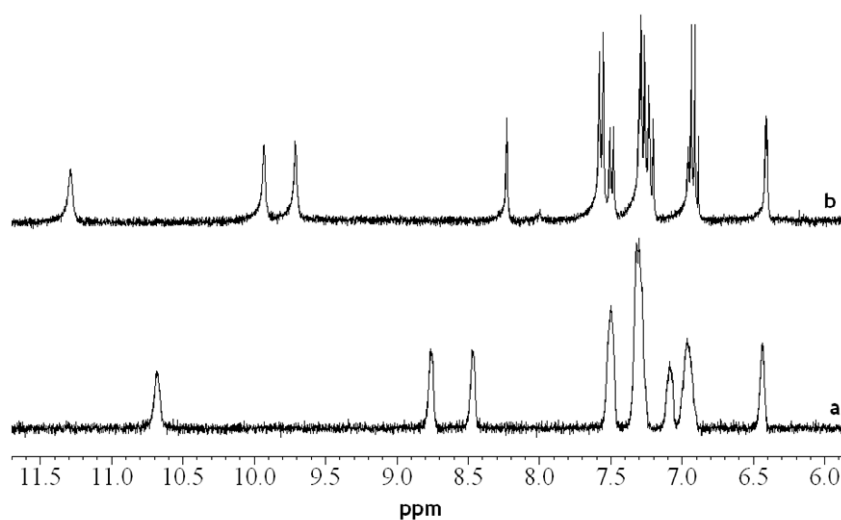

**Fig. S20** Proton NMR spectra of a) Receptor **4**, b) Receptor **4** + 1eq. 1,4,5,6-tetrahydropyrimidine, bubbled with  $\text{CO}_2$  for 3 minutes. Spectra in  $\text{DMSO-}d_6$ .



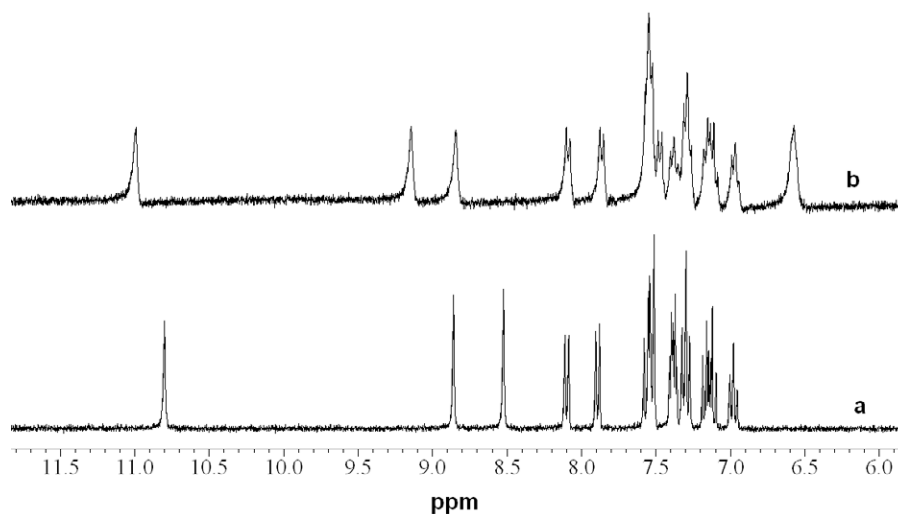

**Fig. S21** Representative <sup>1</sup>H NMR spectra of a) Receptor **5**, b) Receptor **5** + 2eq. n-butylamine bubbled with CO<sub>2</sub> for 3 minutes. Spectra in DMSO-*d*<sub>6</sub>.

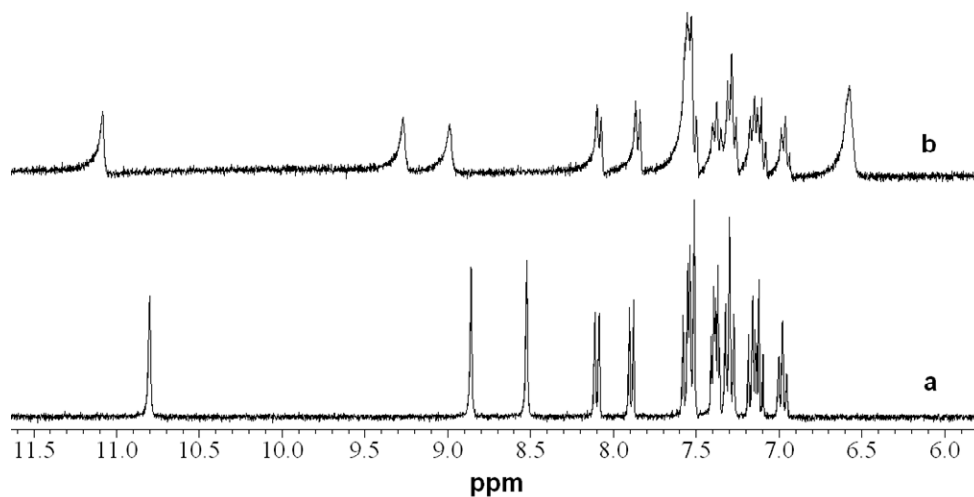

**Fig. S22** Representative <sup>1</sup>H NMR spectra of a) Receptor **5**, b) Receptor **5** + 1eq. 1,3-diaminopropane bubbled with CO<sub>2</sub> for 3 minutes. Spectra in DMSO-*d*<sub>6</sub>.

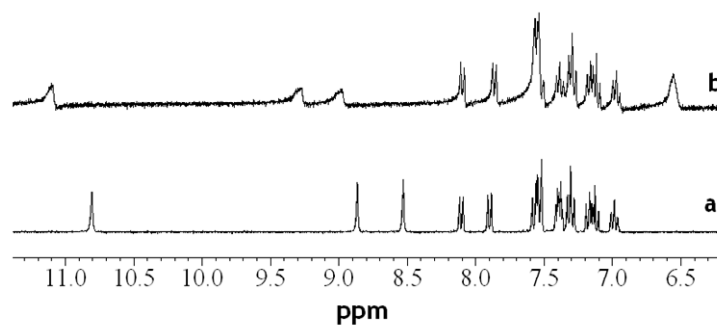

**Fig. S23** Representative  $^1\text{H}$  NMR spectra of a) Receptor **5**, b) Receptor **5** + 2eq. n-butylamine, and 1eq. 18-crown-6, bubbled with  $\text{CO}_2$  for 3 minutes. Spectra in  $\text{DMSO-}d_6$ .

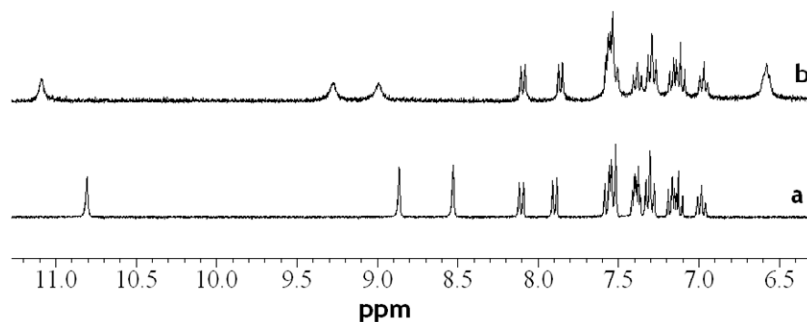

**Fig. S24** Representative  $^1\text{H}$  NMR spectra of a) Receptor **5**, b) Receptor **5** + 1eq. 1,3-diaminopropane and 1eq. 18-crown-6, bubbled with  $\text{CO}_2$  for 3 minutes. Spectra in  $\text{DMSO-}d_6$ .

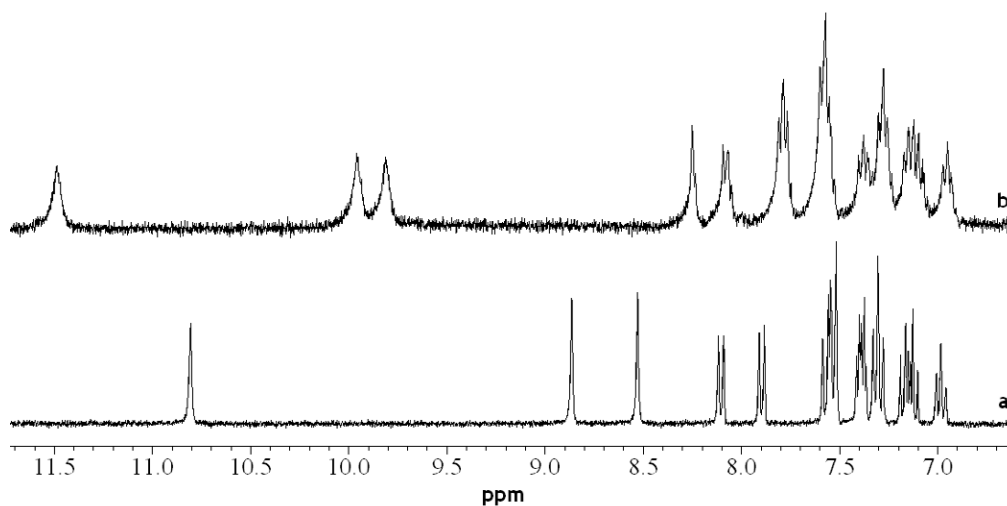

**Fig. S25** Proton NMR spectra of a) Receptor **5**, b) Receptor **5** + 1eq. 1,4,5,6-tetrahydropyrimidine, bubbled with  $\text{CO}_2$  for 3 minutes. Spectra in  $\text{DMSO-}d_6$ .

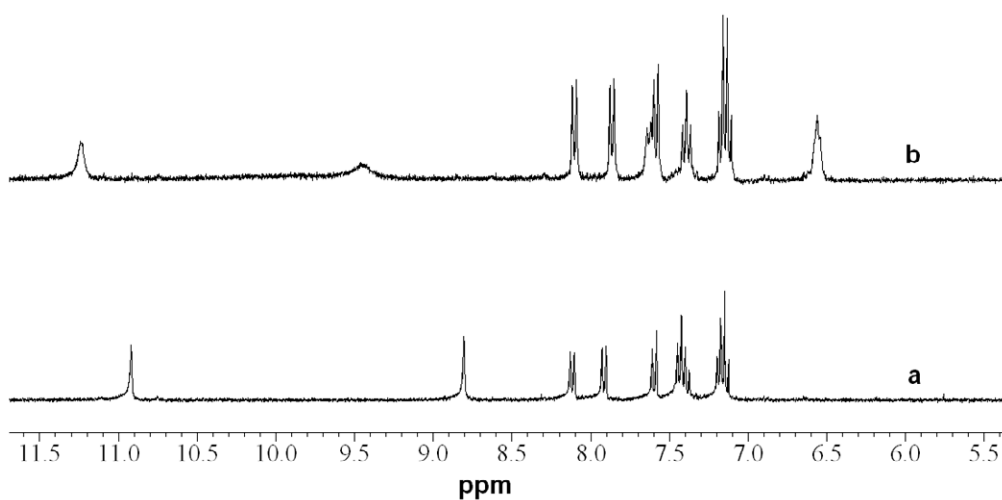

**Fig. S26** Representative  $^1\text{H}$  NMR spectra of a) Receptor **6**, b) Receptor **6** + 2eq. n-butylamine bubbled with  $\text{CO}_2$  for 3 minutes. Spectra in  $\text{DMSO-}d_6$ .

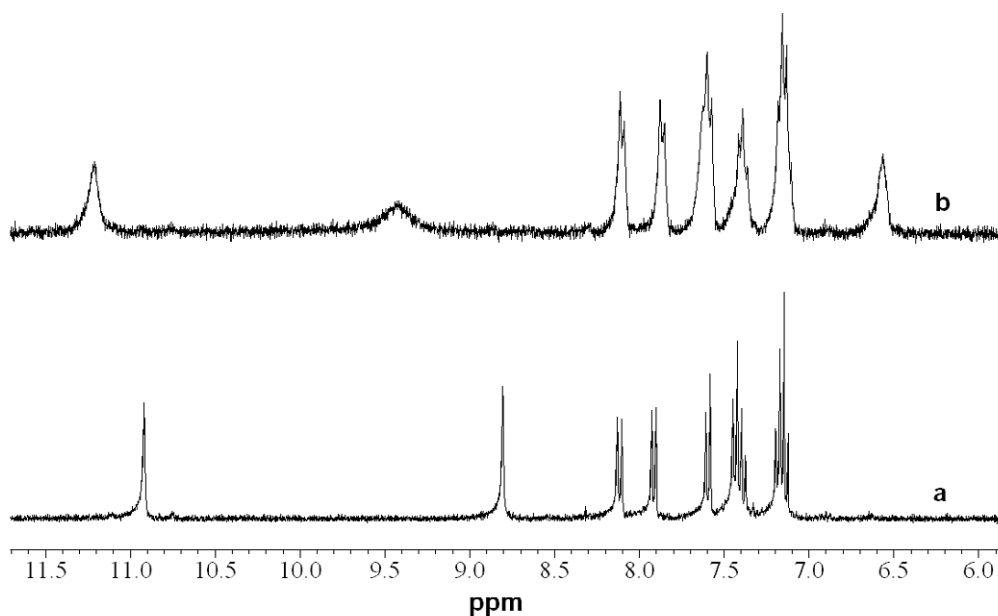

**Fig. S27** Representative  $^1\text{H}$  NMR spectra of a) Receptor **6**, b) Receptor **6** + 1eq. 1,3-diaminopropane bubbled with  $\text{CO}_2$  for 3 minutes. Spectra in  $\text{DMSO-}d_6$ .

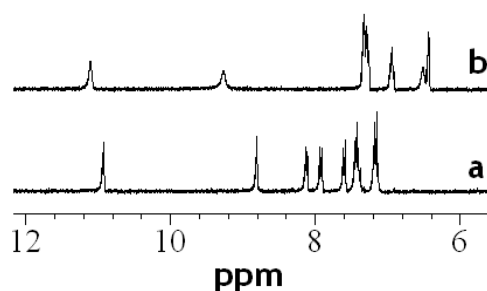

**Fig. S28** Representative  $^1\text{H}$  NMR spectra of a) Receptor **6**, b) Receptor **6** + 2eq. n-butylamine, and 1eq. 18-crown-6, bubbled with  $\text{CO}_2$  for 3 minutes. Spectra in  $\text{DMSO-}d_6$ .

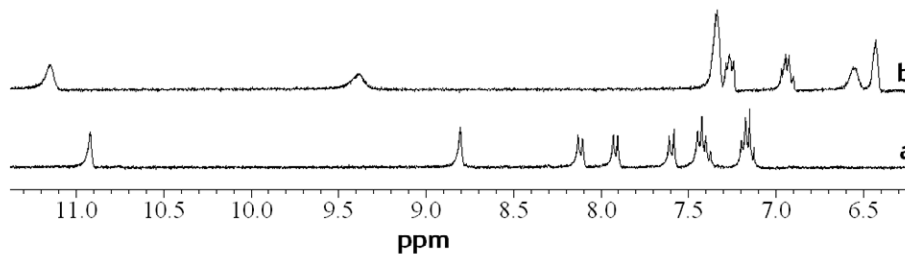

**Fig. S29** Representative  $^1\text{H}$  NMR spectra of a) Receptor **6**, b) Receptor **6** + 1eq. 1,3-diaminopropane and 1eq. 18-crown-6, bubbled with  $\text{CO}_2$  for 3 minutes. Spectra in  $\text{DMSO-}d_6$ .

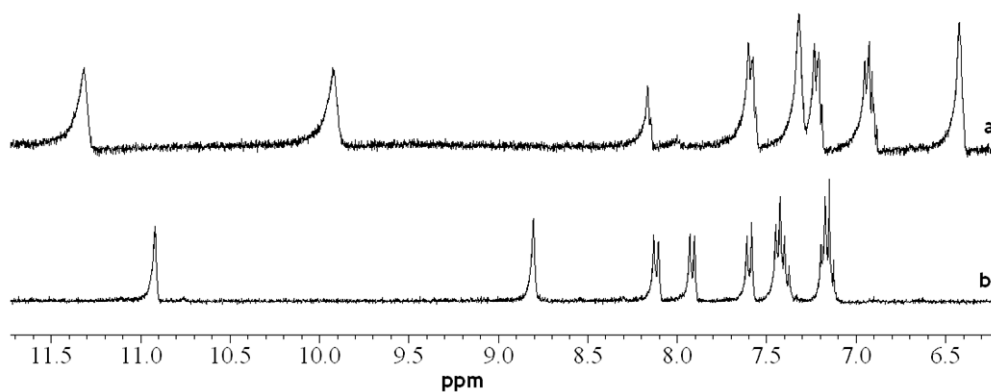

**Fig. S30** Proton NMR spectra of a) Receptor 6, b) Receptor 6 + 1eq. 1,4,5,6-tetrahydropyrimidine, bubbled with CO<sub>2</sub> for 3 minutes. Spectra in DMSO-*d*<sub>6</sub>.

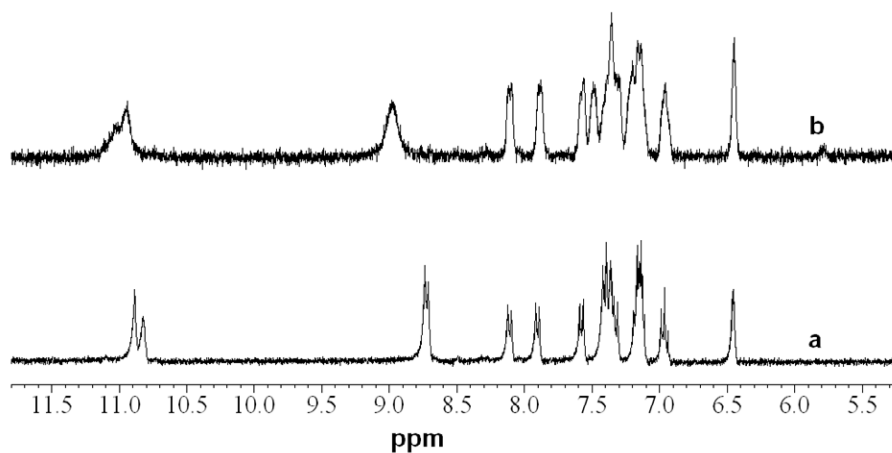

**Fig. S31** Representative <sup>1</sup>H NMR spectra of a) Receptor 7, b) Receptor 7 + 2eq. n-butylamine bubbled with CO<sub>2</sub> for 3 minutes. Spectra in DMSO-*d*<sub>6</sub>.

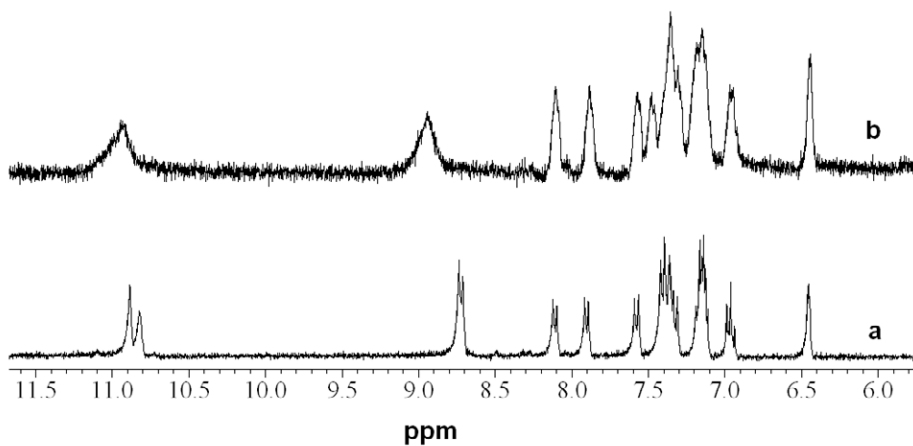

**Fig. S32** Representative  $^1\text{H}$  NMR spectra of a) Receptor 7, b) Receptor 7 + 1eq. 1,3-diaminopropane bubbled with  $\text{CO}_2$  for 3 minutes. Spectra in  $\text{DMSO-}d_6$ .

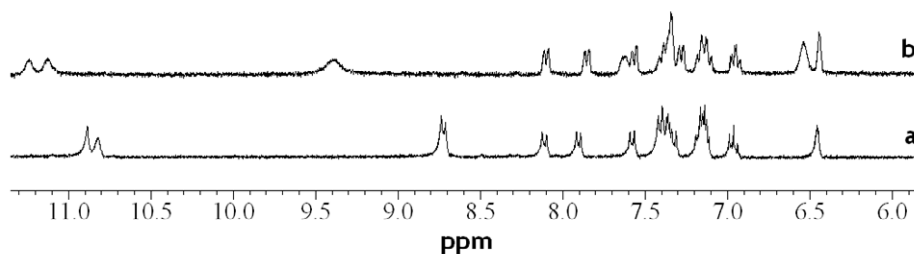

**Fig. S33** Representative  $^1\text{H}$  NMR spectra of a) Receptor 7, b) Receptor 7 + 2eq. n-butylamine, and 1eq. 18-crown-6, bubbled with  $\text{CO}_2$  for 3 minutes. Spectra in  $\text{DMSO-}d_6$ .

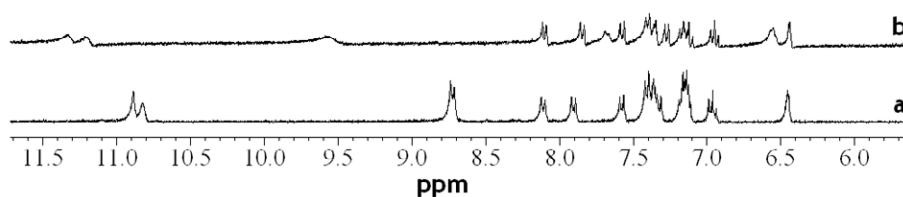

**Fig. S34** Representative  $^1\text{H}$  NMR spectra of a) Receptor 7, b) Receptor 7 + 1eq. 1,3-diaminopropane and 1eq. 18-crown-6, bubbled with  $\text{CO}_2$  for 3 minutes. Spectra in  $\text{DMSO-}d_6$ .

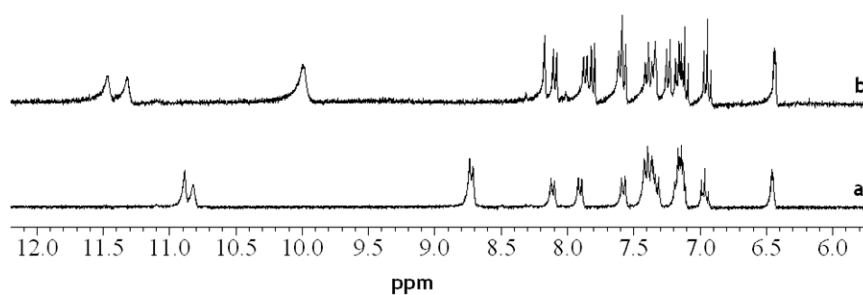

**Fig. S35** Proton NMR spectra of a) Receptor 7, b) Receptor 7 + 1eq. 1,4,5,6-tetrahydropyrimidine, bubbled with  $\text{CO}_2$  for 3 minutes. Spectra in  $\text{DMSO-}d_6$ .

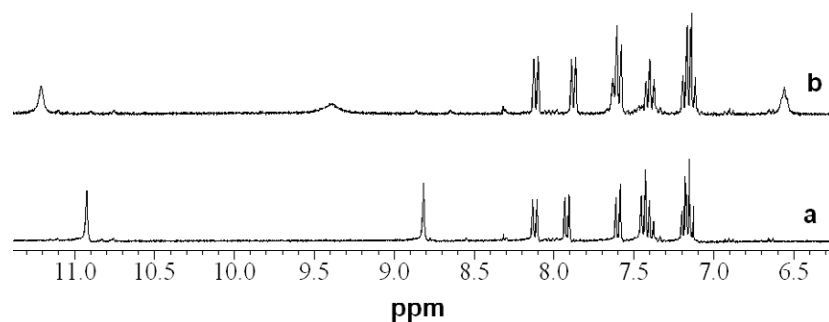

**Fig. S36** Representative <sup>1</sup>H NMR spectra of a) Receptor **8**, b) Receptor **8** + 2eq. n-butylamine bubbled with CO<sub>2</sub> for 3 minutes. Spectra in DMSO-*d*<sub>6</sub>.

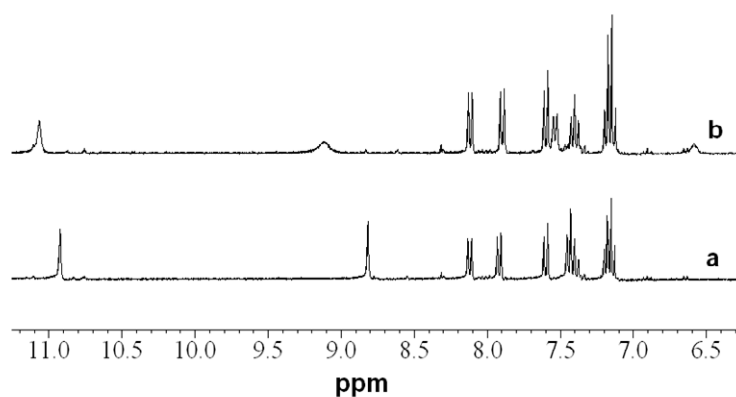

**Fig. S37** Representative <sup>1</sup>H NMR spectra of a) Receptor **8**, b) Receptor **8** + 1eq. 1,3-diaminopropane bubbled with CO<sub>2</sub> for 3 minutes. Spectra in DMSO-*d*<sub>6</sub>.

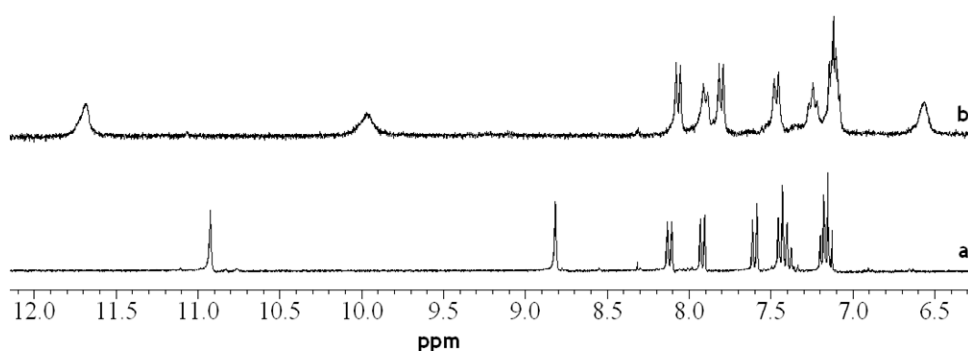

**Fig. S38** Representative <sup>1</sup>H NMR spectra of a) Receptor **8**, b) Receptor **8** + 2eq. n-butylamine, and 1eq. 18-crown-6, bubbled with CO<sub>2</sub> for 3 minutes. Spectra in DMSO-*d*<sub>6</sub>.

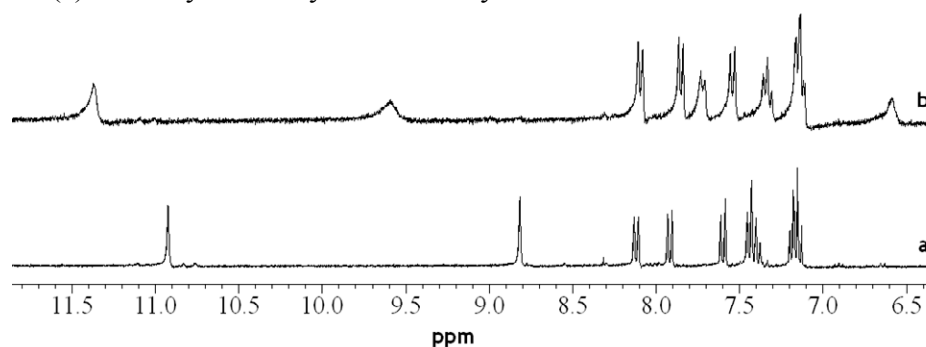

**Fig. S39** Representative <sup>1</sup>H NMR spectra of a) Receptor **8**, b) Receptor **8** + 1 eq. 1,3-diaminopropane and 1 eq. 18-crown-6, bubbled with CO<sub>2</sub> for 3 minutes. Spectra in DMSO-*d*<sub>6</sub>.

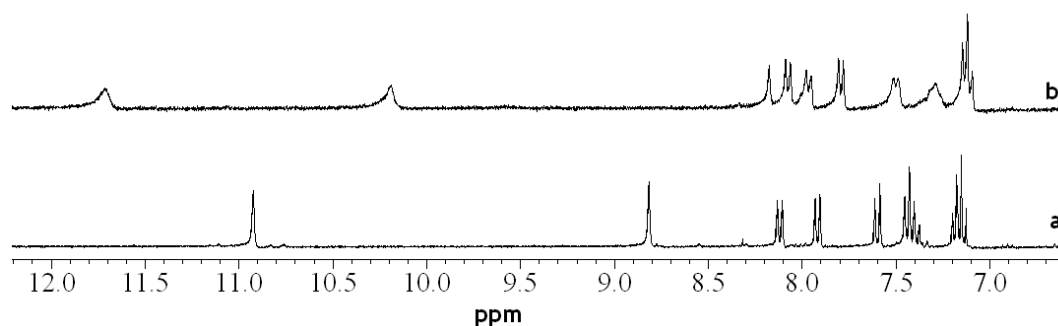

**Fig. S40** Proton NMR spectra of a) Receptor **8**, b) Receptor **8** + 1 eq. 1,4,5,6-tetrahydropyrimidine, bubbled with CO<sub>2</sub> for 3 minutes. Spectra in DMSO-*d*<sub>6</sub>.

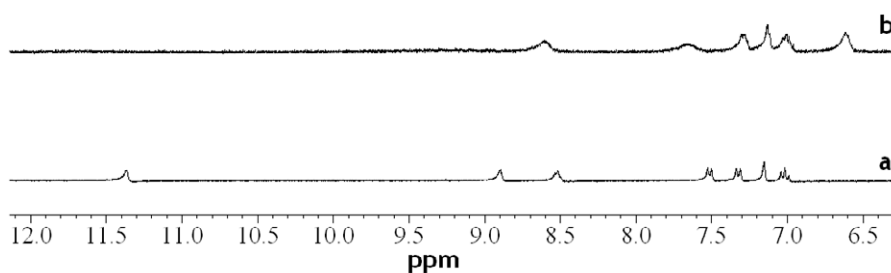

**Fig. S41** Representative <sup>1</sup>H NMR spectra of a) Receptor **9**, b) Receptor **9** + 2 eq. n-butylamine bubbled with CO<sub>2</sub> for 3 minutes. Spectra in DMSO-*d*<sub>6</sub>.

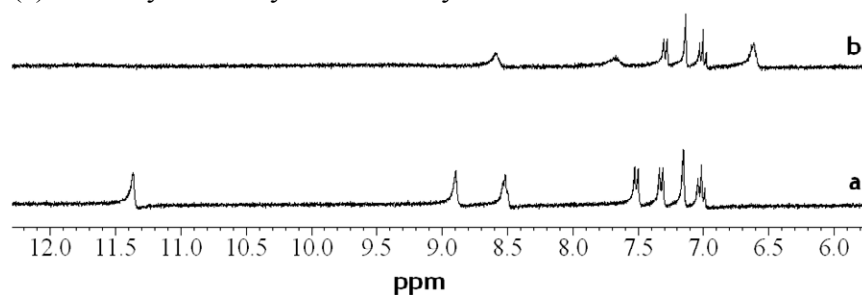

**Fig. S42** Representative <sup>1</sup>H NMR spectra of a) Receptor 9, b) Receptor 9 + 1eq. 1,3-diaminopropane bubbled with CO<sub>2</sub> for 3 minutes. Spectra in DMSO-*d*<sub>6</sub>.

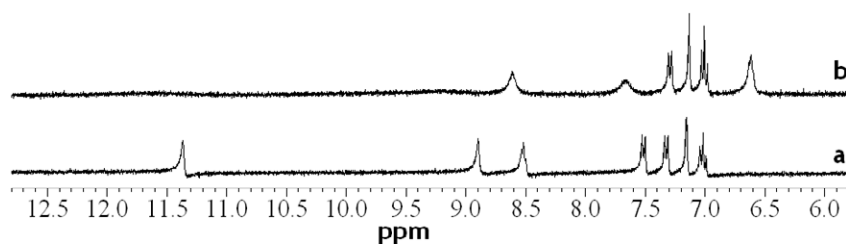

**Fig. S43** Representative <sup>1</sup>H NMR spectra of a) Receptor 9, b) Receptor 9 + 2eq. *n*-butylamine, and 1eq. 18-crown-6, bubbled with CO<sub>2</sub> for 3 minutes. Spectra in DMSO-*d*<sub>6</sub>.

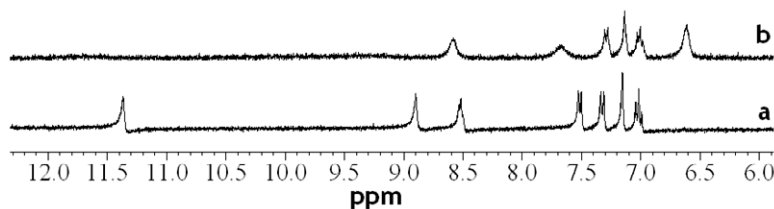

**Fig. S44** Representative <sup>1</sup>H NMR spectra of a) Receptor 9, b) Receptor 9 + 1eq. 1,3-diaminopropane and 1eq. 18-crown-6, bubbled with CO<sub>2</sub> for 3 minutes. Spectra in DMSO-*d*<sub>6</sub>.

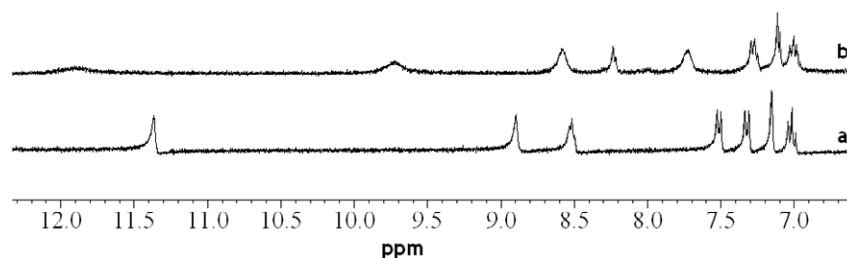

**Fig. S45** Proton NMR spectra of a) Receptor 9, b) Receptor 9 + 1eq. 1,4,5,6-tetrahydropyrimidine, bubbled with CO<sub>2</sub> for 3 minutes. Spectra in DMSO-*d*<sub>6</sub>.



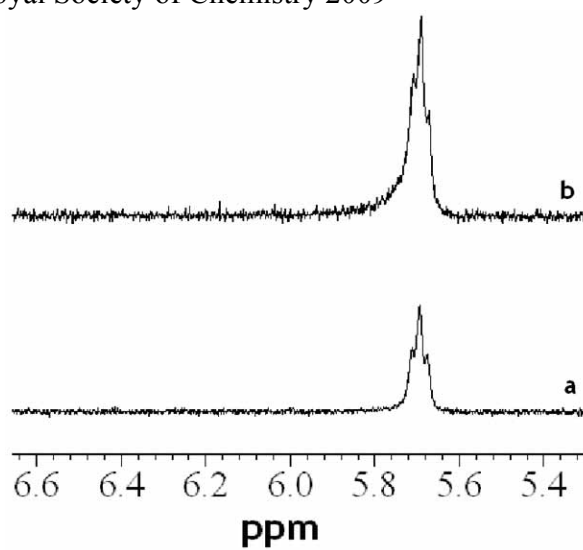

**Fig. S46** Proton NMR spectra of a) Receptor **1**, b) Receptor **1** bubbled with CO<sub>2</sub> for 3 minutes. Spectra in DMSO-*d*<sub>6</sub>.

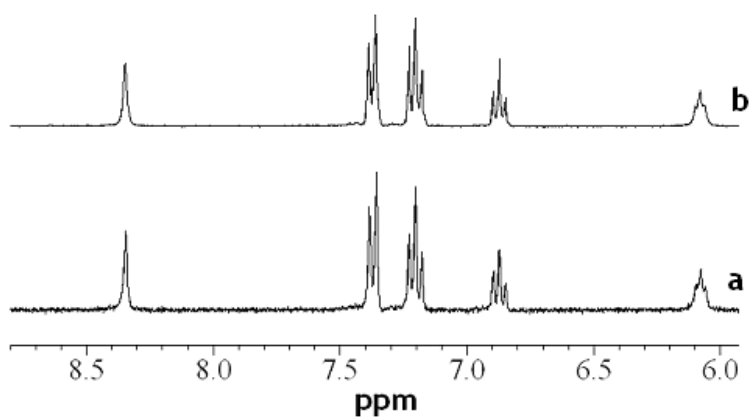

**Fig. S47** Proton NMR spectra of a) Receptor **2**, b) Receptor **2** bubbled with CO<sub>2</sub> for 3 minutes. Spectra in DMSO-*d*<sub>6</sub>.

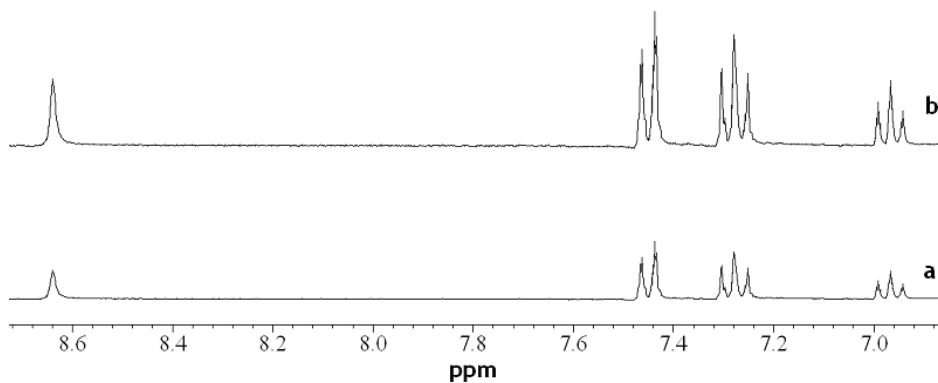

**Fig. S48** Proton NMR spectra of a) Receptor **3**, b) Receptor **3** bubbled with CO<sub>2</sub> for 3 minutes. Spectra in DMSO-*d*<sub>6</sub>.

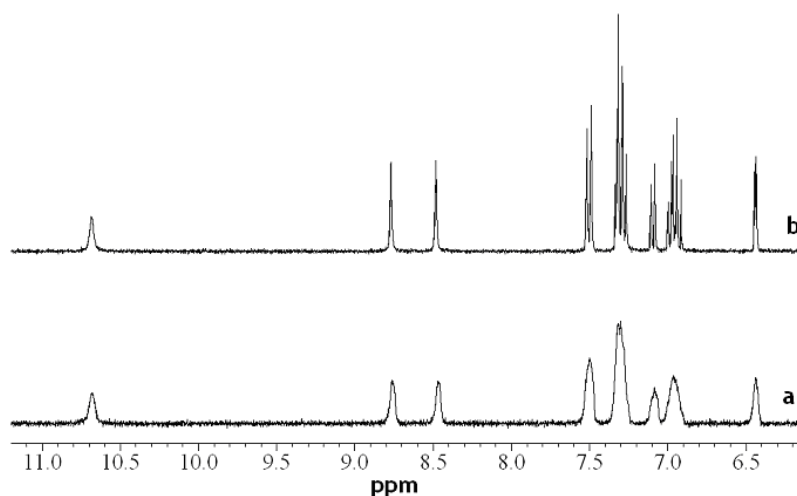

**Fig. S49** Proton NMR spectra of a) Receptor **4**, b) Receptor **4** bubbled with CO<sub>2</sub> for 3 minutes. Spectra in DMSO-*d*<sub>6</sub>.

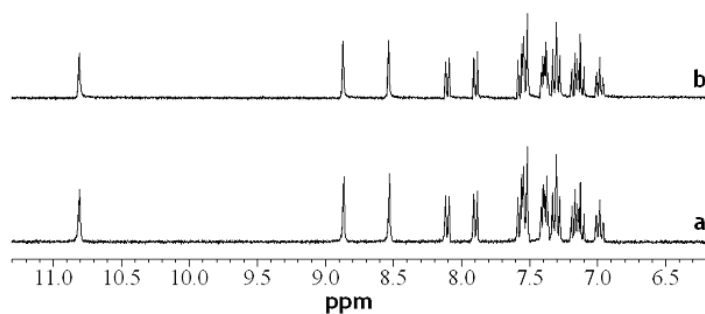

**Fig. S50** Proton NMR spectra of a) Receptor **5**, b) Receptor **5** bubbled with CO<sub>2</sub> for 3 minutes. Spectra in DMSO-*d*<sub>6</sub>.

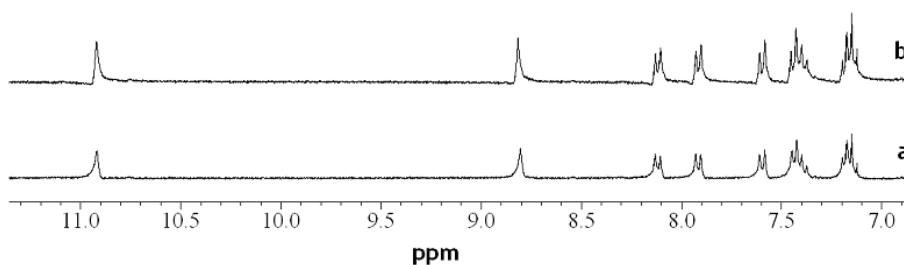

**Fig. S51** Proton NMR spectra of a) Receptor **6**, b) Receptor **6** bubbled with CO<sub>2</sub> for 3 minutes. Spectra in DMSO-*d*<sub>6</sub>.

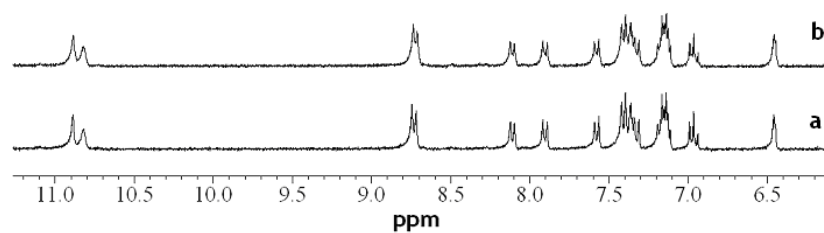

**Fig. S52** Proton NMR spectra of a) Receptor **7**, b) Receptor **7** bubbled with CO<sub>2</sub> for 3 minutes. Spectra in DMSO-*d*<sub>6</sub>.

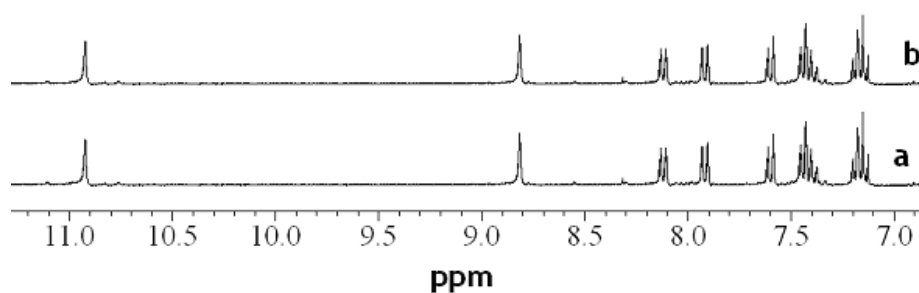

**Fig. S53** Proton NMR spectra of a) Receptor **8**, b) Receptor **8** bubbled with CO<sub>2</sub> for 3 minutes. Spectra in DMSO-*d*<sub>6</sub>.

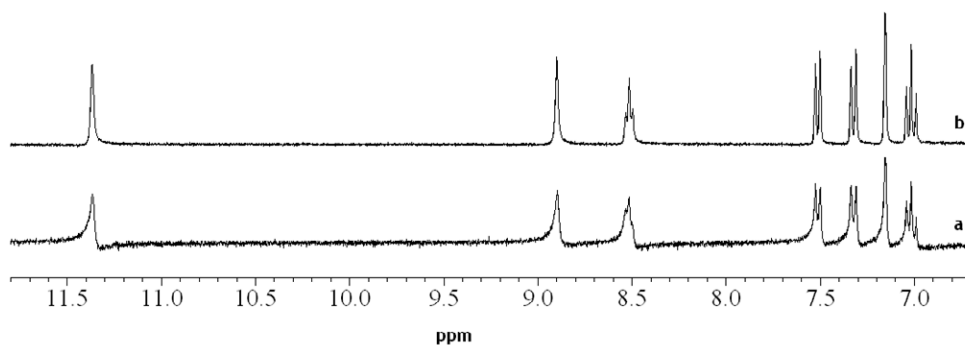

**Fig. S54** Proton NMR spectra of a) Receptor **9**, b) Receptor **9** bubbled with CO<sub>2</sub> for 3 minutes. Spectra in DMSO-*d*<sub>6</sub>.

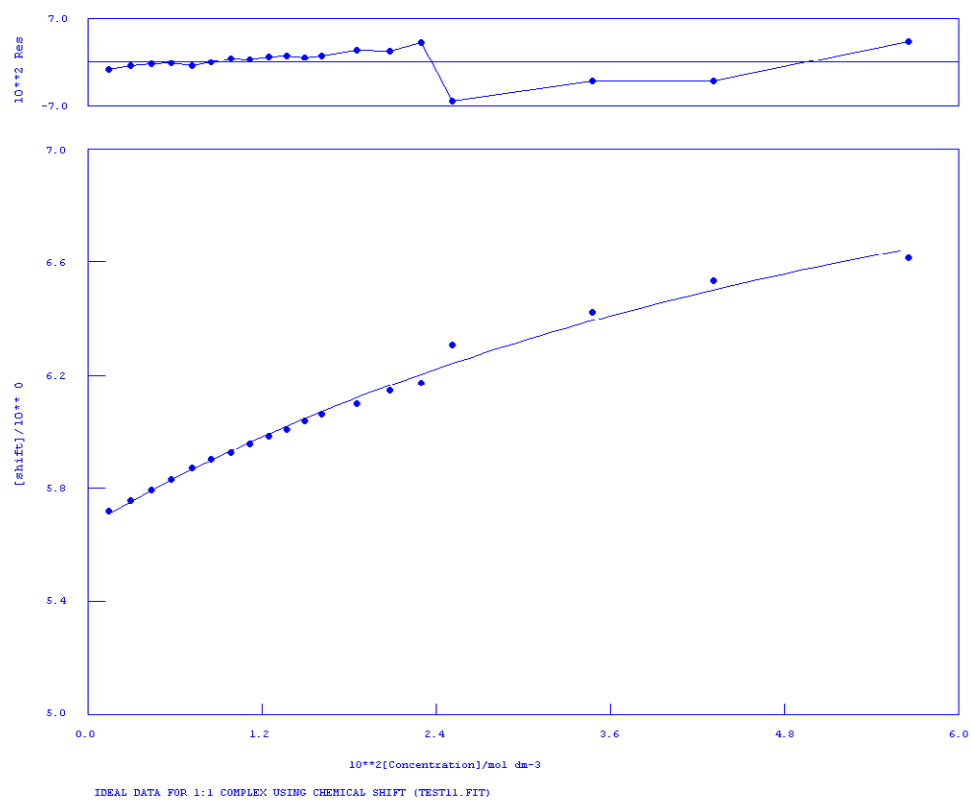

**Fig. S55** Proton NMR titration of compound **1** vs TBAOBz in 0.5% $\text{H}_2\text{O}:\text{DMSO}-d_6$ . (Ideal data for 1:1 complex).  $K_a < 20\text{M}^{-1}$ .

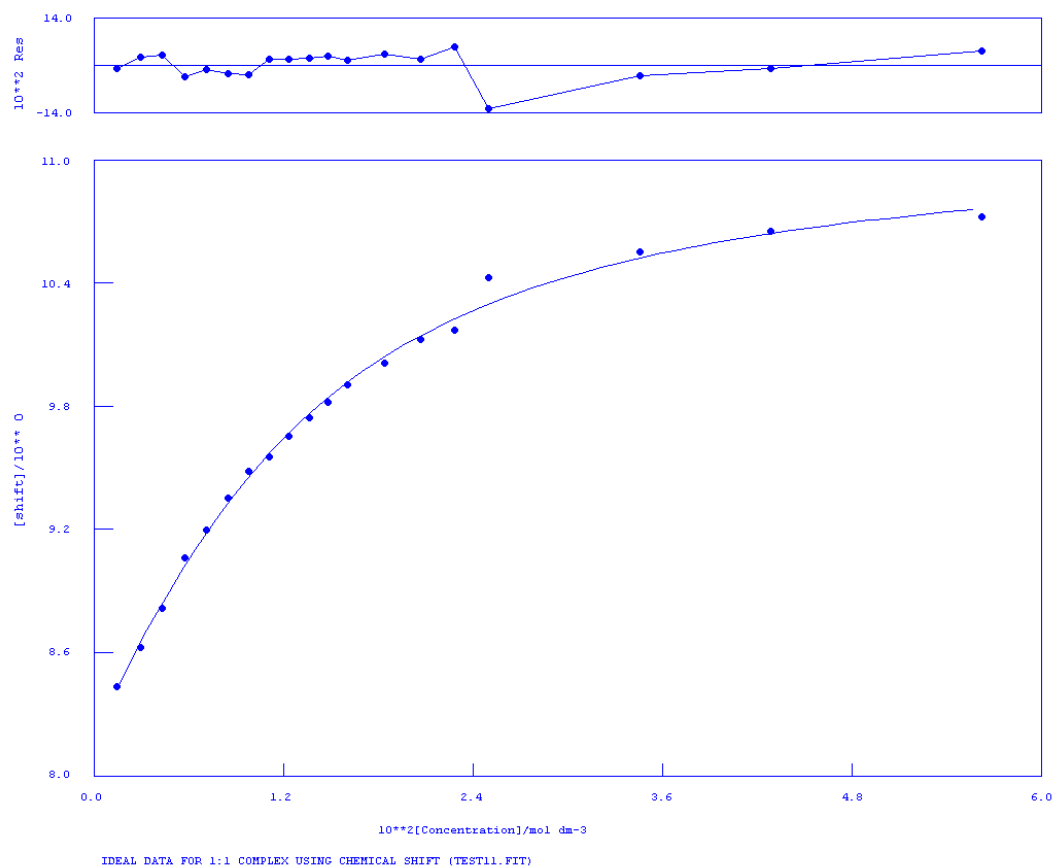

**Fig. S56** Proton NMR titration of compound **2** vs TBAOBz in 0.5% $\text{H}_2\text{O}:\text{DMSO}-d_6$ . (Ideal data for 1:1 complex).  $K_a = 140\text{M}^{-1} (\pm 9\%)$ .

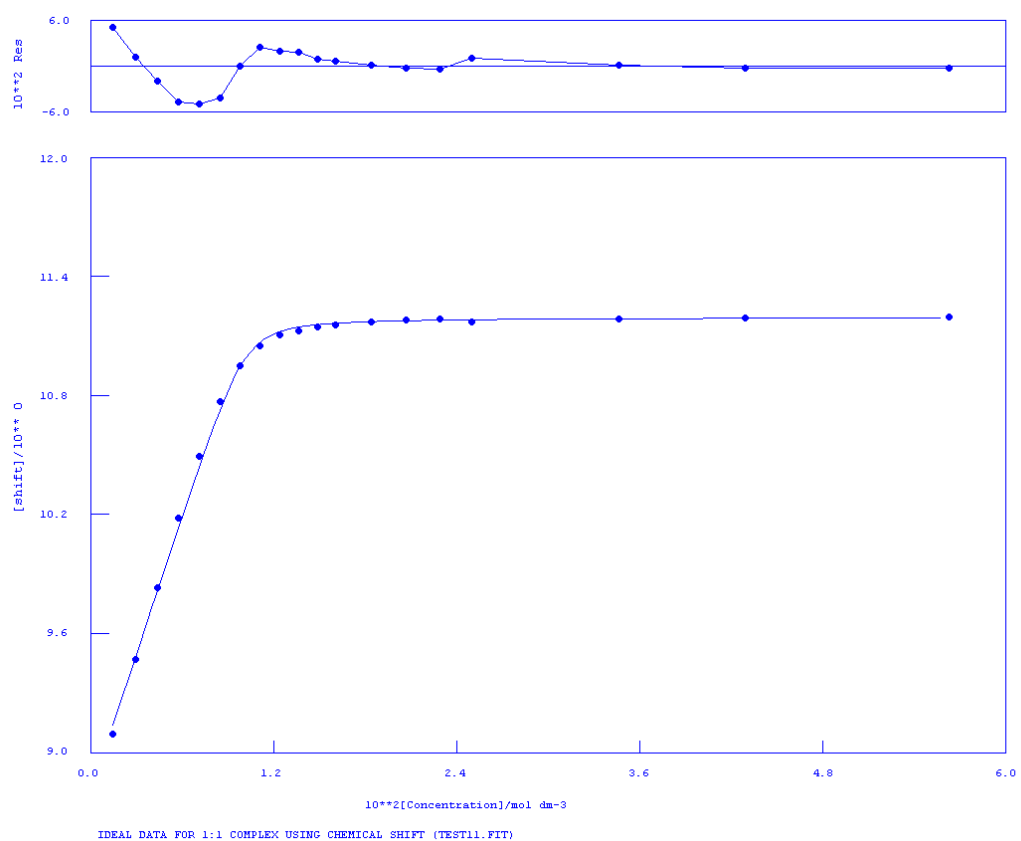

**Fig. S57** Proton NMR titration of compound **4** vs TBAOBz in 0.5% $\text{H}_2\text{O}:\text{DMSO}-d_6$ . (Ideal data for 1:1 complex).  $K_a > 10,000\text{M}^{-1}$ .

**Table S1.** Crystal data and structure refinement details.

|                                            |                                                                                                                                                                                                                                                                                                                                |                             |
|--------------------------------------------|--------------------------------------------------------------------------------------------------------------------------------------------------------------------------------------------------------------------------------------------------------------------------------------------------------------------------------|-----------------------------|
| Identification code                        | <b>2008sot1042</b>                                                                                                                                                                                                                                                                                                             |                             |
| Empirical formula                          | C <sub>87</sub> H <sub>135</sub> N <sub>16</sub> O <sub>22.50</sub> S <sub>0.50</sub><br>2 (C <sub>27</sub> H <sub>32</sub> N <sub>6</sub> O <sub>3</sub> ), 2 (C <sub>12</sub> H <sub>24</sub> O <sub>6</sub> ), 2 (C <sub>4</sub> H <sub>10</sub> N <sub>2</sub> O <sub>2</sub> ),<br>0.5 (C <sub>2</sub> H <sub>6</sub> OS) |                             |
| Formula weight                             | 1781.14                                                                                                                                                                                                                                                                                                                        |                             |
| Temperature                                | 293(2) K                                                                                                                                                                                                                                                                                                                       |                             |
| Wavelength                                 | 0.68890 Å                                                                                                                                                                                                                                                                                                                      |                             |
| Crystal system                             | Triclinic                                                                                                                                                                                                                                                                                                                      |                             |
| Space group                                | P-1                                                                                                                                                                                                                                                                                                                            |                             |
| Unit cell dimensions                       | $a = 12.626(7)$ Å                                                                                                                                                                                                                                                                                                              | $\alpha = 84.204(10)^\circ$ |
|                                            | $b = 14.165(9)$ Å                                                                                                                                                                                                                                                                                                              | $\beta = 77.246(8)^\circ$   |
|                                            | $c = 27.564(17)$ Å                                                                                                                                                                                                                                                                                                             | $\gamma = 72.121(9)^\circ$  |
| Volume                                     | 4573(5) Å <sup>3</sup>                                                                                                                                                                                                                                                                                                         |                             |
| Z                                          | 2                                                                                                                                                                                                                                                                                                                              |                             |
| Density (calculated)                       | 1.294 Mg / m <sup>3</sup>                                                                                                                                                                                                                                                                                                      |                             |
| Absorption coefficient                     | 0.105 mm <sup>-1</sup>                                                                                                                                                                                                                                                                                                         |                             |
| $F(000)$                                   | 1914                                                                                                                                                                                                                                                                                                                           |                             |
| Crystal                                    | Colourless block                                                                                                                                                                                                                                                                                                               |                             |
| Crystal size                               | 0.05 × 0.03 × 0.02 mm <sup>3</sup>                                                                                                                                                                                                                                                                                             |                             |
| $\theta$ range for data collection         | 2.90 – 24.21°                                                                                                                                                                                                                                                                                                                  |                             |
| Index ranges                               | -13 ≤ $h$ ≤ 14, -14 ≤ $k$ ≤ 16, -30 ≤ $l$ ≤ 32                                                                                                                                                                                                                                                                                 |                             |
| Reflections collected                      | 34055                                                                                                                                                                                                                                                                                                                          |                             |
| Independent reflections                    | 14794 [ $R_{int} = 0.0680$ ]                                                                                                                                                                                                                                                                                                   |                             |
| Completeness to $\theta = 24.21^\circ$     | 91.7 %                                                                                                                                                                                                                                                                                                                         |                             |
| Max. and min. transmission                 | 0.9979 and 0.9948                                                                                                                                                                                                                                                                                                              |                             |
| Refinement method                          | Full-matrix least-squares on $F^2$                                                                                                                                                                                                                                                                                             |                             |
| Data / restraints / parameters             | 14794 / 0 / 1151                                                                                                                                                                                                                                                                                                               |                             |
| Goodness-of-fit on $F^2$                   | 1.052                                                                                                                                                                                                                                                                                                                          |                             |
| Final $R$ indices [ $F^2 > 2\sigma(F^2)$ ] | $R1 = 0.0649$ , $wR2 = 0.1813$                                                                                                                                                                                                                                                                                                 |                             |
| $R$ indices (all data)                     | $R1 = 0.0854$ , $wR2 = 0.1936$                                                                                                                                                                                                                                                                                                 |                             |
| Largest diff. peak and hole                | 0.283 and -0.484 e Å <sup>-3</sup>                                                                                                                                                                                                                                                                                             |                             |

**Diffraction:** Nonius KappaCCD area detector ( $\phi$  scans and  $\omega$  scans to fill *asymmetric unit*). **Cell determination:** DirAx (Duisenberg, A.J.M.(1992). *J. Appl. Cryst.* 25, 92-96.) **Data collection:** Collect (Collect: Data collection software, R. Hooft, Nonius B.V., 1998). **Data reduction and cell refinement:** Denzo (Z. Otwinowski & W. Minor, *Methods in Enzymology* (1997) Vol. 276: *Macromolecular Crystallography*, part A, pp. 307–326; C. W. Carter, Jr. & R. M. Sweet, Eds., Academic Press). **Absorption correction:** Sheldrick, G. M. SADABS - Bruker Nonius area detector scaling and absorption correction - V2.10 **Structure solution:** SHELXS97 (G. M. Sheldrick, *Acta Cryst.* (1990) A46 467–473). **Structure refinement:** SHELXL97 (G. M. Sheldrick (1997), University of Göttingen, Germany). **Graphics:** Cameron - A Molecular Graphics Package. (D. M. Watkin, L. Pearce and C. K. Prout, Chemical Crystallography Laboratory, University of Oxford, 1993).

**Special details:** All hydrogen atoms were placed in idealised positions and refined using a riding model.

**Table S2.** Atomic coordinates [ $\times 10^4$ ], equivalent isotropic displacement parameters [ $\text{\AA}^2 \times 10^3$ ] and site occupancy factors.  $U_{eq}$  is defined as one third of the trace of the orthogonalized  $U^{ij}$  tensor.

| Atom | <i>x</i> | <i>y</i> | <i>z</i> | $U_{eq}$ | <i>S.o.f.</i> |
|------|----------|----------|----------|----------|---------------|
| O1   | 1760(2)  | 2700(2)  | 3245(1)  | 41(1)    | 1             |
| O2   | 6919(2)  | 4379(2)  | 2280(1)  | 38(1)    | 1             |
| O3   | 5950(2)  | 1405(2)  | -52(1)   | 40(1)    | 1             |
| N1   | 1216(2)  | 2676(2)  | 4084(1)  | 33(1)    | 1             |
| N2   | 3377(2)  | 3623(2)  | 3276(1)  | 26(1)    | 1             |
| N3   | 5104(2)  | 4325(2)  | 2574(1)  | 28(1)    | 1             |
| N4   | 5872(2)  | 4127(2)  | 1752(1)  | 31(1)    | 1             |
| N5   | 5894(2)  | 2940(2)  | 934(1)   | 29(1)    | 1             |
| N6   | 4630(2)  | 1765(2)  | 651(1)   | 32(1)    | 1             |
| C1   | 1467(3)  | -563(3)  | 4454(1)  | 45(1)    | 1             |
| C2   | 1435(3)  | 415(2)   | 4160(1)  | 40(1)    | 1             |
| C3   | 441(3)   | 1263(2)  | 4393(1)  | 33(1)    | 1             |
| C4   | 305(3)   | 2239(2)  | 4099(1)  | 35(1)    | 1             |
| C5   | 1878(2)  | 2872(2)  | 3658(1)  | 28(1)    | 1             |
| C6   | 2760(2)  | 3316(2)  | 3705(1)  | 27(1)    | 1             |
| C7   | 3165(3)  | 3450(2)  | 4105(1)  | 29(1)    | 1             |
| C8   | 4086(3)  | 3852(2)  | 3920(1)  | 27(1)    | 1             |
| C9   | 4841(3)  | 4128(2)  | 4140(1)  | 34(1)    | 1             |
| C10  | 5671(3)  | 4474(2)  | 3838(1)  | 36(1)    | 1             |
| C11  | 5785(3)  | 4549(2)  | 3315(1)  | 33(1)    | 1             |
| C12  | 5058(2)  | 4287(2)  | 3089(1)  | 27(1)    | 1             |
| C13  | 4198(2)  | 3947(2)  | 3398(1)  | 26(1)    | 1             |
| C14  | 6045(3)  | 4280(2)  | 2211(1)  | 28(1)    | 1             |
| C15  | 6695(3)  | 4025(2)  | 1311(1)  | 30(1)    | 1             |
| C16  | 7555(3)  | 4476(2)  | 1211(1)  | 32(1)    | 1             |
| C17  | 8346(3)  | 4343(2)  | 760(1)   | 39(1)    | 1             |
| C18  | 8301(3)  | 3779(3)  | 396(1)   | 40(1)    | 1             |
| C19  | 7435(3)  | 3320(2)  | 480(1)   | 34(1)    | 1             |
| C20  | 6646(2)  | 3455(2)  | 936(1)   | 30(1)    | 1             |
| C21  | 7112(3)  | 2708(2)  | 203(1)   | 37(1)    | 1             |
| C22  | 6179(3)  | 2485(2)  | 483(1)   | 31(1)    | 1             |
| C23  | 5574(3)  | 1853(2)  | 343(1)   | 32(1)    | 1             |
| C24  | 3988(3)  | 1161(2)  | 531(1)   | 38(1)    | 1             |
| C25  | 3234(3)  | 1677(2)  | 163(1)   | 37(1)    | 1             |
| C26  | 2365(3)  | 2645(2)  | 347(1)   | 42(1)    | 1             |
| C27  | 1615(3)  | 3144(3)  | -19(1)   | 53(1)    | 1             |
| O4   | 8760(2)  | 6683(2)  | 4956(1)  | 37(1)    | 1             |
| O5   | 8325(2)  | 11633(2) | 2912(1)  | 36(1)    | 1             |
| O6   | 13503(2) | 7488(2)  | 1869(1)  | 40(1)    | 1             |
| N7   | 10165(2) | 6706(2)  | 4298(1)  | 30(1)    | 1             |
| N8   | 9002(2)  | 8769(2)  | 4115(1)  | 27(1)    | 1             |
| N9   | 9251(2)  | 10463(2) | 3431(1)  | 30(1)    | 1             |
| N10  | 10080(2) | 10574(2) | 2613(1)  | 29(1)    | 1             |
| N11  | 11861(2) | 9304(2)  | 1883(1)  | 26(1)    | 1             |
| N12  | 14129(2) | 7652(2)  | 1040(1)  | 34(1)    | 1             |
| C28  | 13152(4) | 6366(3)  | 4956(2)  | 61(1)    | 1             |
| C29  | 12440(3) | 6328(3)  | 4584(1)  | 44(1)    | 1             |
| C30  | 11601(3) | 5753(2)  | 4782(1)  | 34(1)    | 1             |
| C31  | 10868(3) | 5720(2)  | 4417(1)  | 32(1)    | 1             |
| C32  | 9181(3)  | 7130(2)  | 4591(1)  | 29(1)    | 1             |
| C33  | 8581(3)  | 8180(2)  | 4488(1)  | 29(1)    | 1             |
| C34  | 7570(3)  | 8739(2)  | 4754(1)  | 33(1)    | 1             |



## Supplementary Material (ESI) for Organic &amp; Biomolecular Chemistry

This journal is (c) The Royal Society of Chemistry 2009

|     |          |          |         |       |   |
|-----|----------|----------|---------|-------|---|
| C35 | 7352(3)  | 9718(2)  | 4546(1) | 30(1) | 1 |
| C36 | 6490(3)  | 10609(2) | 4657(1) | 36(1) | 1 |
| C37 | 6571(3)  | 11439(2) | 4367(1) | 37(1) | 1 |
| C38 | 7477(3)  | 11417(2) | 3963(1) | 34(1) | 1 |
| C39 | 8336(3)  | 10554(2) | 3840(1) | 28(1) | 1 |
| C40 | 8272(2)  | 9709(2)  | 4144(1) | 27(1) | 1 |
| C41 | 9151(3)  | 10952(2) | 2973(1) | 28(1) | 1 |
| C42 | 10179(2) | 10808(2) | 2097(1) | 27(1) | 1 |
| C43 | 9487(3)  | 11599(2) | 1882(1) | 30(1) | 1 |
| C44 | 9665(3)  | 11764(2) | 1362(1) | 36(1) | 1 |
| C45 | 10529(3) | 11146(2) | 1049(1) | 37(1) | 1 |
| C46 | 11255(3) | 10324(2) | 1254(1) | 30(1) | 1 |
| C47 | 11071(3) | 10162(2) | 1777(1) | 28(1) | 1 |
| C48 | 12197(3) | 9518(2)  | 1056(1) | 32(1) | 1 |
| C49 | 12538(3) | 8910(2)  | 1445(1) | 29(1) | 1 |
| C50 | 13427(2) | 7959(2)  | 1469(1) | 30(1) | 1 |
| C51 | 15025(3) | 6714(2)  | 994(1)  | 35(1) | 1 |
| C52 | 14814(3) | 5992(2)  | 686(1)  | 37(1) | 1 |
| C53 | 13835(3) | 5595(2)  | 925(1)  | 41(1) | 1 |
| C54 | 13651(3) | 4878(3)  | 602(1)  | 46(1) | 1 |
| O7  | 3519(2)  | 3727(2)  | 2221(1) | 32(1) | 1 |
| O8  | 3932(2)  | 2871(2)  | 1530(1) | 34(1) | 1 |
| N14 | 4973(2)  | -357(2)  | 2488(1) | 32(1) | 1 |
| C55 | 3443(2)  | 3051(2)  | 1974(1) | 27(1) | 1 |
| N13 | 2771(2)  | 2484(2)  | 2211(1) | 28(1) | 1 |
| C57 | 2637(2)  | 1661(2)  | 1989(1) | 30(1) | 1 |
| C58 | 3659(3)  | 742(2)   | 1968(1) | 29(1) | 1 |
| C59 | 3808(3)  | 313(2)   | 2483(1) | 34(1) | 1 |
| O9  | 11643(2) | 8884(1)  | 2900(1) | 32(1) | 1 |
| O10 | 11036(2) | 7943(2)  | 3537(1) | 33(1) | 1 |
| N16 | 9736(2)  | 6091(2)  | 2485(1) | 31(1) | 1 |
| C60 | 11570(2) | 8055(2)  | 3102(1) | 28(1) | 1 |
| N15 | 12132(2) | 7235(2)  | 2831(1) | 30(1) | 1 |
| C62 | 12200(2) | 6236(2)  | 3017(1) | 30(1) | 1 |
| C63 | 11127(3) | 5961(2)  | 3020(1) | 32(1) | 1 |
| C64 | 10937(3) | 5965(2)  | 2500(1) | 37(1) | 1 |
| O11 | 26(2)    | 5260(2)  | 1521(1) | 39(1) | 1 |
| O12 | -173(2)  | 4140(2)  | 2463(1) | 40(1) | 1 |
| O13 | -1594(2) | 5147(2)  | 3304(1) | 38(1) | 1 |
| O14 | -1772(2) | 7183(2)  | 3347(1) | 35(1) | 1 |
| O15 | -1356(2) | 8241(2)  | 2433(1) | 35(1) | 1 |
| O16 | 37(2)    | 7220(2)  | 1575(1) | 41(1) | 1 |
| C65 | 630(3)   | 4241(2)  | 1594(1) | 45(1) | 1 |
| C66 | -63(3)   | 3757(2)  | 1988(1) | 42(1) | 1 |
| C67 | -812(3)  | 3671(2)  | 2846(1) | 43(1) | 1 |
| C68 | -962(3)  | 4130(2)  | 3326(1) | 44(1) | 1 |
| C69 | -1744(3) | 5628(3)  | 3754(1) | 40(1) | 1 |
| C70 | -2430(3) | 6677(3)  | 3705(1) | 41(1) | 1 |
| C71 | -2369(3) | 8192(2)  | 3266(1) | 36(1) | 1 |
| C72 | -1604(3) | 8667(2)  | 2905(1) | 36(1) | 1 |
| C73 | -547(3)  | 8609(2)  | 2087(1) | 38(1) | 1 |
| C74 | -433(3)  | 8274(2)  | 1582(1) | 40(1) | 1 |
| C75 | 72(3)    | 6817(3)  | 1120(1) | 48(1) | 1 |
| C76 | 669(3)   | 5740(3)  | 1147(1) | 48(1) | 1 |
| O17 | 6752(2)  | 9054(2)  | 1554(1) | 37(1) | 1 |
| O18 | 5818(2)  | 7662(2)  | 2129(1) | 43(1) | 1 |

## Supplementary Material (ESI) for Organic &amp; Biomolecular Chemistry

This journal is (c) The Royal Society of Chemistry 2009

|     |         |          |         |        |      |
|-----|---------|----------|---------|--------|------|
| O19 | 5067(2) | 7802(2)  | 3189(1) | 42(1)  | 1    |
| O20 | 4636(2) | 9667(2)  | 3553(1) | 41(1)  | 1    |
| O21 | 5809(2) | 10932(2) | 2977(1) | 38(1)  | 1    |
| O22 | 6321(2) | 10895(2) | 1915(1) | 37(1)  | 1    |
| C77 | 6608(3) | 8242(3)  | 1341(1) | 48(1)  | 1    |
| C78 | 6734(3) | 7406(2)  | 1720(1) | 47(1)  | 1    |
| C79 | 5737(3) | 6850(2)  | 2466(2) | 51(1)  | 1    |
| C80 | 4783(3) | 7193(3)  | 2891(1) | 48(1)  | 1    |
| C81 | 4179(3) | 8166(3)  | 3603(1) | 50(1)  | 1    |
| C82 | 4534(3) | 8835(3)  | 3873(1) | 48(1)  | 1    |
| C83 | 5026(3) | 10340(3) | 3770(1) | 44(1)  | 1    |
| C84 | 5013(3) | 11221(3) | 3430(1) | 43(1)  | 1    |
| C85 | 5893(3) | 11776(2) | 2659(1) | 39(1)  | 1    |
| C86 | 6729(3) | 11450(2) | 2194(1) | 39(1)  | 1    |
| C87 | 7091(3) | 10598(2) | 1459(1) | 42(1)  | 1    |
| C88 | 6723(3) | 9894(2)  | 1220(1) | 41(1)  | 1    |
| C89 | 8914(4) | 427(5)   | 141(2)  | 111(2) | 1    |
| S1  | 9952(2) | -435(2)  | 306(1)  | 54(1)  | 0.50 |
| O23 | 9687(6) | -1331(4) | 209(2)  | 79(2)  | 0.50 |

---

**Table S3.** Bond lengths [Å] and angles [°].

|         |          |         |          |
|---------|----------|---------|----------|
| O1–C5   | 1.236(4) | N12–C50 | 1.334(4) |
| O2–C14  | 1.212(4) | N12–C51 | 1.452(4) |
| O3–C23  | 1.242(4) | C28–C29 | 1.519(5) |
| N1–C5   | 1.340(3) | C29–C30 | 1.506(4) |
| N1–C4   | 1.455(4) | C30–C31 | 1.522(4) |
| N2–C13  | 1.369(4) | C32–C33 | 1.478(4) |
| N2–C6   | 1.375(3) | C33–C34 | 1.370(4) |
| N3–C14  | 1.362(4) | C34–C35 | 1.415(4) |
| N3–C12  | 1.403(4) | C35–C36 | 1.399(4) |
| N4–C14  | 1.379(4) | C35–C40 | 1.416(4) |
| N4–C15  | 1.402(4) | C36–C37 | 1.370(4) |
| N5–C20  | 1.364(4) | C37–C38 | 1.404(4) |
| N5–C22  | 1.383(4) | C38–C39 | 1.376(4) |
| N6–C23  | 1.335(4) | C39–C40 | 1.402(4) |
| N6–C24  | 1.449(4) | C42–C43 | 1.366(4) |
| C1–C2   | 1.527(4) | C42–C47 | 1.405(4) |
| C2–C3   | 1.518(5) | C43–C44 | 1.407(4) |
| C3–C4   | 1.513(4) | C44–C45 | 1.361(4) |
| C5–C6   | 1.471(4) | C45–C46 | 1.398(4) |
| C6–C7   | 1.366(4) | C46–C47 | 1.417(4) |
| C7–C8   | 1.422(4) | C46–C48 | 1.421(4) |
| C8–C9   | 1.401(4) | C48–C49 | 1.369(4) |
| C8–C13  | 1.411(4) | C49–C50 | 1.471(4) |
| C9–C10  | 1.371(4) | C51–C52 | 1.511(5) |
| C10–C11 | 1.413(4) | C52–C53 | 1.507(5) |
| C11–C12 | 1.371(4) | C53–C54 | 1.517(5) |
| C12–C13 | 1.402(4) | O7–C55  | 1.266(3) |
| C15–C16 | 1.386(4) | O8–C55  | 1.258(3) |
| C15–C20 | 1.398(4) | N14–C59 | 1.488(4) |
| C16–C17 | 1.400(4) | C55–N13 | 1.362(3) |
| C17–C18 | 1.365(5) | N13–C57 | 1.440(4) |
| C18–C19 | 1.401(4) | C57–C58 | 1.522(4) |
| C19–C20 | 1.409(4) | C58–C59 | 1.514(4) |
| C19–C21 | 1.411(5) | O9–C60  | 1.268(3) |
| C21–C22 | 1.364(4) | O10–C60 | 1.260(3) |
| C22–C23 | 1.466(4) | N16–C64 | 1.481(4) |
| C24–C25 | 1.522(5) | C60–N15 | 1.359(4) |
| C25–C26 | 1.520(5) | N15–C62 | 1.438(4) |
| C26–C27 | 1.509(5) | C62–C63 | 1.518(4) |
| O4–C32  | 1.239(3) | C63–C64 | 1.505(4) |
| O5–C41  | 1.214(4) | O11–C76 | 1.419(4) |
| O6–C50  | 1.237(3) | O11–C65 | 1.428(4) |
| N7–C32  | 1.325(4) | O12–C67 | 1.420(4) |
| N7–C31  | 1.457(4) | O12–C66 | 1.430(4) |
| N8–C40  | 1.366(4) | O13–C68 | 1.420(4) |
| N8–C33  | 1.377(3) | O13–C69 | 1.423(4) |
| N9–C41  | 1.388(4) | O14–C71 | 1.418(4) |
| N9–C39  | 1.410(4) | O14–C70 | 1.427(4) |
| N10–C41 | 1.363(4) | O15–C73 | 1.421(4) |
| N10–C42 | 1.412(4) | O15–C72 | 1.421(4) |
| N11–C47 | 1.367(4) | O16–C75 | 1.416(4) |
| N11–C49 | 1.373(4) | O16–C74 | 1.428(4) |

## Supplementary Material (ESI) for Organic &amp; Biomolecular Chemistry

This journal is (c) The Royal Society of Chemistry 2009

|             |          |                     |          |
|-------------|----------|---------------------|----------|
| C65–C66     | 1.487(5) | O21–C84             | 1.425(4) |
| C67–C68     | 1.481(5) | O21–C85             | 1.427(4) |
| C69–C70     | 1.483(5) | O22–C87             | 1.421(4) |
| C71–C72     | 1.487(4) | O22–C86             | 1.421(4) |
| C73–C74     | 1.478(5) | C77–C78             | 1.493(5) |
| C75–C76     | 1.482(5) | C79–C80             | 1.480(5) |
| O17–C77     | 1.418(4) | C81–C82             | 1.485(5) |
| O17–C88     | 1.425(4) | C83–C84             | 1.480(5) |
| O18–C78     | 1.409(4) | C85–C86             | 1.481(5) |
| O18–C79     | 1.419(4) | C87–C88             | 1.483(5) |
| O19–C80     | 1.419(4) | C89–S1              | 1.608(6) |
| O19–C81     | 1.422(4) | S1–O23              | 1.471(6) |
| O20–C82     | 1.420(4) | S1–C89 <sup>i</sup> | 1.672(6) |
| O20–C83     | 1.429(4) |                     |          |
|             |          |                     |          |
| C5–N1–C4    | 122.9(3) | C20–C19–C21         | 105.9(3) |
| C13–N2–C6   | 108.7(2) | N5–C20–C15          | 128.9(3) |
| C14–N3–C12  | 125.9(3) | N5–C20–C19          | 108.6(3) |
| C14–N4–C15  | 124.6(3) | C15–C20–C19         | 122.5(3) |
| C20–N5–C22  | 108.4(2) | C22–C21–C19         | 108.4(3) |
| C23–N6–C24  | 121.2(3) | C21–C22–N5          | 108.7(3) |
| C3–C2–C1    | 111.6(3) | C21–C22–C23         | 126.8(3) |
| C2–C3–C4    | 114.5(2) | N5–C22–C23          | 124.5(2) |
| N1–C4–C3    | 113.7(3) | O3–C23–N6           | 121.4(3) |
| O1–C5–N1    | 122.6(3) | O3–C23–C22          | 120.0(3) |
| O1–C5–C6    | 121.0(2) | N6–C23–C22          | 118.7(3) |
| N1–C5–C6    | 116.3(3) | N6–C24–C25          | 113.1(3) |
| C7–C6–N2    | 109.5(3) | C24–C25–C26         | 113.5(3) |
| C7–C6–C5    | 132.3(2) | C27–C26–C25         | 113.0(3) |
| N2–C6–C5    | 118.0(3) | C32–N7–C31          | 121.4(2) |
| C6–C7–C8    | 107.2(2) | C40–N8–C33          | 108.8(2) |
| C9–C8–C13   | 119.2(3) | C41–N9–C39          | 123.7(3) |
| C9–C8–C7    | 134.2(3) | C41–N10–C42         | 125.9(3) |
| C13–C8–C7   | 106.6(3) | C47–N11–C49         | 109.0(2) |
| C10–C9–C8   | 118.4(3) | C50–N12–C51         | 123.2(3) |
| C9–C10–C11  | 121.8(3) | C30–C29–C28         | 112.9(3) |
| C12–C11–C10 | 121.1(3) | C29–C30–C31         | 113.6(2) |
| C11–C12–C13 | 117.2(3) | N7–C31–C30          | 111.9(2) |
| C11–C12–N3  | 125.5(3) | O4–C32–N7           | 122.2(3) |
| C13–C12–N3  | 117.3(3) | O4–C32–C33          | 118.9(3) |
| N2–C13–C12  | 129.8(3) | N7–C32–C33          | 118.8(2) |
| N2–C13–C8   | 107.9(2) | C34–C33–N8          | 109.0(3) |
| C12–C13–C8  | 122.3(3) | C34–C33–C32         | 126.9(3) |
| O2–C14–N3   | 124.4(3) | N8–C33–C32          | 124.1(3) |
| O2–C14–N4   | 124.0(3) | C33–C34–C35         | 107.8(3) |
| N3–C14–N4   | 111.6(3) | C36–C35–C34         | 134.7(3) |
| C16–C15–C20 | 116.6(3) | C36–C35–C40         | 119.0(3) |
| C16–C15–N4  | 124.4(3) | C34–C35–C40         | 106.2(3) |
| C20–C15–N4  | 119.0(3) | C37–C36–C35         | 118.3(3) |
| C15–C16–C17 | 121.2(3) | C36–C37–C38         | 122.2(3) |
| C18–C17–C16 | 122.0(3) | C39–C38–C37         | 121.3(3) |
| C17–C18–C19 | 118.5(3) | C38–C39–C40         | 116.7(3) |
| C18–C19–C20 | 119.2(3) | C38–C39–N9          | 124.7(3) |
| C18–C19–C21 | 134.9(3) | C40–C39–N9          | 118.6(3) |

## Supplementary Material (ESI) for Organic &amp; Biomolecular Chemistry

This journal is (c) The Royal Society of Chemistry 2009

|             |          |                         |          |
|-------------|----------|-------------------------|----------|
| N8-C40-C39  | 129.4(3) | O14-C71-C72             | 108.9(2) |
| N8-C40-C35  | 108.1(2) | O15-C72-C71             | 109.4(3) |
| C39-C40-C35 | 122.5(3) | O15-C73-C74             | 110.4(3) |
| O5-C41-N10  | 125.3(3) | O16-C74-C73             | 109.3(3) |
| O5-C41-N9   | 122.8(3) | O16-C75-C76             | 107.6(3) |
| N10-C41-N9  | 111.9(3) | O11-C76-C75             | 110.1(3) |
| C43-C42-C47 | 117.2(3) | C77-O17-C88             | 113.2(3) |
| C43-C42-N10 | 126.0(3) | C78-O18-C79             | 113.1(3) |
| C47-C42-N10 | 116.8(3) | C80-O19-C81             | 112.4(3) |
| C42-C43-C44 | 121.4(3) | C82-O20-C83             | 112.8(3) |
| C45-C44-C43 | 122.0(3) | C84-O21-C85             | 111.0(2) |
| C44-C45-C46 | 118.6(3) | C87-O22-C86             | 111.5(2) |
| C45-C46-C47 | 119.2(3) | O17-C77-C78             | 107.0(3) |
| C45-C46-C48 | 134.9(3) | O18-C78-C77             | 108.8(3) |
| C47-C46-C48 | 105.9(3) | O18-C79-C80             | 109.5(3) |
| N11-C47-C42 | 130.1(3) | O19-C80-C79             | 109.5(3) |
| N11-C47-C46 | 108.2(2) | O19-C81-C82             | 108.1(3) |
| C42-C47-C46 | 121.7(3) | O20-C82-C81             | 108.1(3) |
| C49-C48-C46 | 107.9(3) | O20-C83-C84             | 109.0(3) |
| C48-C49-N11 | 109.1(3) | O21-C84-C83             | 109.6(3) |
| C48-C49-C50 | 132.4(3) | O21-C85-C86             | 109.6(2) |
| N11-C49-C50 | 118.4(2) | O22-C86-C85             | 110.2(3) |
| O6-C50-N12  | 123.1(3) | O22-C87-C88             | 109.4(3) |
| O6-C50-C49  | 120.7(3) | O17-C88-C87             | 106.7(3) |
| N12-C50-C49 | 116.2(2) | O23-S1-C89              | 101.4(4) |
| N12-C51-C52 | 112.5(3) | O23-S1-C89 <sup>i</sup> | 103.1(4) |
| C53-C52-C51 | 114.7(3) | C89-S1-C89 <sup>i</sup> | 105.3(2) |
| C52-C53-C54 | 112.8(3) |                         |          |
| O8-C55-O7   | 124.9(3) |                         |          |
| O8-C55-N13  | 117.9(3) |                         |          |
| O7-C55-N13  | 117.1(2) |                         |          |
| C55-N13-C57 | 123.7(2) |                         |          |
| N13-C57-C58 | 113.0(2) |                         |          |
| C59-C58-C57 | 111.8(2) |                         |          |
| N14-C59-C58 | 112.6(2) |                         |          |
| O10-C60-O9  | 124.5(3) |                         |          |
| O10-C60-N15 | 118.3(2) |                         |          |
| O9-C60-N15  | 117.1(2) |                         |          |
| C60-N15-C62 | 124.1(2) |                         |          |
| N15-C62-C63 | 112.7(2) |                         |          |
| C64-C63-C62 | 111.1(2) |                         |          |
| N16-C64-C63 | 112.8(2) |                         |          |
| C76-O11-C65 | 111.6(3) |                         |          |
| C67-O12-C66 | 111.2(2) |                         |          |
| C68-O13-C69 | 112.3(2) |                         |          |
| C71-O14-C70 | 112.7(2) |                         |          |
| C73-O15-C72 | 111.5(2) |                         |          |
| C75-O16-C74 | 113.5(2) |                         |          |
| O11-C65-C66 | 110.4(3) |                         |          |
| O12-C66-C65 | 110.3(3) |                         |          |
| O12-C67-C68 | 109.3(3) |                         |          |
| O13-C68-C67 | 110.0(3) |                         |          |
| O13-C69-C70 | 109.0(3) |                         |          |
| O14-C70-C69 | 108.5(3) |                         |          |

Symmetry transformations used to generate equivalent atoms:

(i)  $-x+2, -y, -z$

---

**Table S4.** Anisotropic displacement parameters [ $\text{\AA}^2 \times 10^3$ ]. The anisotropic displacement factor exponent takes the form:  $-2\pi^2[h^2a^{*2}U^{11} + \dots + 2hk a^* b^* U^{12}]$ .

| Atom | $U^{11}$ | $U^{22}$ | $U^{33}$ | $U^{23}$ | $U^{13}$ | $U^{12}$ |
|------|----------|----------|----------|----------|----------|----------|
| O1   | 36(1)    | 67(2)    | 24(1)    | -8(1)    | 1(1)     | -23(1)   |
| O2   | 30(1)    | 52(1)    | 35(1)    | 1(1)     | -6(1)    | -16(1)   |
| O3   | 42(1)    | 46(1)    | 24(1)    | -4(1)    | 1(1)     | -9(1)    |
| N1   | 32(2)    | 41(1)    | 26(1)    | 0(1)     | -3(1)    | -15(1)   |
| N2   | 24(1)    | 30(1)    | 23(1)    | -1(1)    | -3(1)    | -5(1)    |
| N3   | 20(1)    | 34(1)    | 31(1)    | 2(1)     | -8(1)    | -8(1)    |
| N4   | 23(2)    | 40(1)    | 29(1)    | -1(1)    | -2(1)    | -9(1)    |
| N5   | 26(2)    | 36(1)    | 22(1)    | 2(1)     | -2(1)    | -8(1)    |
| N6   | 36(2)    | 40(1)    | 21(1)    | -3(1)    | -3(1)    | -13(1)   |
| C1   | 42(2)    | 45(2)    | 52(2)    | 6(2)     | -8(2)    | -21(2)   |
| C2   | 36(2)    | 50(2)    | 36(2)    | 4(1)     | -4(2)    | -21(2)   |
| C3   | 26(2)    | 48(2)    | 28(2)    | 3(1)     | -6(1)    | -18(2)   |
| C4   | 26(2)    | 49(2)    | 33(2)    | -4(1)    | -3(1)    | -15(2)   |
| C5   | 21(2)    | 30(2)    | 28(2)    | -1(1)    | -1(1)    | -3(1)    |
| C6   | 22(2)    | 24(1)    | 28(2)    | 0(1)     | 1(1)     | -2(1)    |
| C7   | 32(2)    | 30(2)    | 21(1)    | 0(1)     | -1(1)    | -6(1)    |
| C8   | 26(2)    | 25(1)    | 28(2)    | -4(1)    | -6(1)    | -3(1)    |
| C9   | 35(2)    | 35(2)    | 32(2)    | -2(1)    | -9(1)    | -8(2)    |
| C10  | 34(2)    | 39(2)    | 40(2)    | -2(1)    | -12(2)   | -13(2)   |
| C11  | 31(2)    | 37(2)    | 32(2)    | 1(1)     | -5(1)    | -12(1)   |
| C12  | 28(2)    | 25(1)    | 29(2)    | 0(1)     | -5(1)    | -8(1)    |
| C13  | 23(2)    | 24(1)    | 30(2)    | -3(1)    | -5(1)    | -3(1)    |
| C14  | 24(2)    | 26(2)    | 30(2)    | 2(1)     | -3(1)    | -6(1)    |
| C15  | 27(2)    | 30(2)    | 28(2)    | 5(1)     | -4(1)    | -2(1)    |
| C16  | 28(2)    | 32(2)    | 35(2)    | 10(1)    | -9(1)    | -9(1)    |
| C17  | 30(2)    | 48(2)    | 39(2)    | 13(1)    | -4(1)    | -17(2)   |
| C18  | 31(2)    | 57(2)    | 31(2)    | 11(1)    | -3(1)    | -16(2)   |
| C19  | 28(2)    | 44(2)    | 26(2)    | 9(1)     | -6(1)    | -10(2)   |
| C20  | 23(2)    | 34(2)    | 27(2)    | 6(1)     | -4(1)    | -5(1)    |
| C21  | 33(2)    | 51(2)    | 22(2)    | 1(1)     | -2(1)    | -9(2)    |
| C22  | 31(2)    | 36(2)    | 22(1)    | 3(1)     | -5(1)    | -6(1)    |
| C23  | 32(2)    | 37(2)    | 20(1)    | 3(1)     | -4(1)    | -4(1)    |
| C24  | 48(2)    | 40(2)    | 27(2)    | -3(1)    | -4(1)    | -16(2)   |
| C25  | 40(2)    | 45(2)    | 29(2)    | -5(1)    | -2(1)    | -17(2)   |
| C26  | 40(2)    | 46(2)    | 41(2)    | -9(1)    | -7(2)    | -14(2)   |
| C27  | 40(2)    | 60(2)    | 56(2)    | -5(2)    | -7(2)    | -12(2)   |
| O4   | 41(1)    | 40(1)    | 26(1)    | 3(1)     | 2(1)     | -15(1)   |
| O5   | 33(1)    | 34(1)    | 34(1)    | 2(1)     | -5(1)    | -4(1)    |
| O6   | 36(1)    | 48(1)    | 27(1)    | 5(1)     | -2(1)    | -5(1)    |
| N7   | 33(2)    | 32(1)    | 22(1)    | 3(1)     | -2(1)    | -8(1)    |
| N8   | 26(1)    | 31(1)    | 21(1)    | -3(1)    | -3(1)    | -6(1)    |
| N9   | 24(2)    | 33(1)    | 31(1)    | 1(1)     | -6(1)    | -6(1)    |
| N10  | 25(2)    | 31(1)    | 31(1)    | 1(1)     | -6(1)    | -7(1)    |
| N11  | 28(2)    | 30(1)    | 22(1)    | 1(1)     | -4(1)    | -12(1)   |
| N12  | 31(2)    | 38(1)    | 26(1)    | 0(1)     | -2(1)    | -7(1)    |
| C28  | 59(3)    | 65(3)    | 66(3)    | -10(2)   | -27(2)   | -17(2)   |
| C29  | 44(2)    | 42(2)    | 47(2)    | 0(2)     | -17(2)   | -11(2)   |
| C30  | 42(2)    | 31(2)    | 24(2)    | 3(1)     | -9(1)    | -2(1)    |
| C31  | 38(2)    | 29(2)    | 27(2)    | 2(1)     | -5(1)    | -9(1)    |
| C32  | 33(2)    | 36(2)    | 21(1)    | 1(1)     | -5(1)    | -14(1)   |
| C33  | 30(2)    | 35(2)    | 22(1)    | -4(1)    | -2(1)    | -11(1)   |

|     |       |       |       |        |        |        |
|-----|-------|-------|-------|--------|--------|--------|
| C34 | 30(2) | 40(2) | 25(2) | -1(1)  | -3(1)  | -9(1)  |
| C35 | 28(2) | 38(2) | 24(2) | -7(1)  | -4(1)  | -7(1)  |
| C36 | 29(2) | 47(2) | 25(2) | -7(1)  | -1(1)  | -3(2)  |
| C37 | 34(2) | 40(2) | 31(2) | -14(1) | -4(1)  | -1(2)  |
| C38 | 43(2) | 30(2) | 29(2) | -4(1)  | -11(1) | -9(2)  |
| C39 | 33(2) | 30(2) | 22(1) | -8(1)  | -3(1)  | -9(1)  |
| C40 | 27(2) | 29(2) | 25(1) | -8(1)  | -7(1)  | -4(1)  |
| C41 | 29(2) | 29(2) | 31(2) | -4(1)  | -7(1)  | -14(2) |
| C42 | 28(2) | 29(2) | 30(2) | 2(1)   | -6(1)  | -16(1) |
| C43 | 31(2) | 27(2) | 34(2) | 0(1)   | -5(1)  | -14(1) |
| C44 | 38(2) | 31(2) | 36(2) | 6(1)   | -7(2)  | -11(1) |
| C45 | 42(2) | 41(2) | 29(2) | 6(1)   | -8(1)  | -19(2) |
| C46 | 35(2) | 30(2) | 27(2) | 2(1)   | -5(1)  | -16(1) |
| C47 | 26(2) | 31(2) | 29(2) | 2(1)   | -5(1)  | -13(1) |
| C48 | 34(2) | 36(2) | 29(2) | 0(1)   | -4(1)  | -16(1) |
| C49 | 27(2) | 37(2) | 24(1) | 0(1)   | -2(1)  | -15(1) |
| C50 | 22(2) | 40(2) | 26(2) | 1(1)   | -2(1)  | -11(1) |
| C51 | 26(2) | 43(2) | 31(2) | -2(1)  | -3(1)  | -4(1)  |
| C52 | 34(2) | 39(2) | 30(2) | -2(1)  | -5(1)  | 2(2)   |
| C53 | 40(2) | 37(2) | 41(2) | -5(1)  | -7(2)  | -4(2)  |
| C54 | 45(2) | 39(2) | 47(2) | -6(2)  | -13(2) | 0(2)   |
| O7  | 32(1) | 35(1) | 31(1) | -3(1)  | -6(1)  | -14(1) |
| O8  | 33(1) | 45(1) | 25(1) | -2(1)  | 2(1)   | -16(1) |
| N14 | 34(2) | 32(1) | 31(1) | 0(1)   | -10(1) | -7(1)  |
| C55 | 23(2) | 33(2) | 24(2) | 1(1)   | -6(1)  | -7(1)  |
| N13 | 29(2) | 34(1) | 21(1) | -4(1)  | 2(1)   | -13(1) |
| C57 | 24(2) | 35(2) | 29(2) | -1(1)  | -5(1)  | -9(1)  |
| C58 | 31(2) | 35(2) | 23(1) | 1(1)   | -7(1)  | -13(1) |
| C59 | 29(2) | 36(2) | 34(2) | 2(1)   | -6(1)  | -9(1)  |
| O9  | 37(1) | 30(1) | 27(1) | 1(1)   | -6(1)  | -9(1)  |
| O10 | 30(1) | 38(1) | 24(1) | 1(1)   | -1(1)  | -6(1)  |
| N16 | 39(2) | 29(1) | 30(1) | -1(1)  | -10(1) | -13(1) |
| C60 | 22(2) | 34(2) | 29(2) | 2(1)   | -8(1)  | -9(1)  |
| N15 | 29(2) | 33(1) | 24(1) | -2(1)  | 1(1)   | -8(1)  |
| C62 | 26(2) | 31(2) | 31(2) | 0(1)   | -5(1)  | -5(1)  |
| C63 | 34(2) | 30(2) | 30(2) | 3(1)   | -6(1)  | -10(1) |
| C64 | 26(2) | 44(2) | 39(2) | -7(1)  | -7(1)  | -6(2)  |
| O11 | 38(1) | 38(1) | 38(1) | -7(1)  | -6(1)  | -6(1)  |
| O12 | 42(1) | 35(1) | 50(1) | 2(1)   | -16(1) | -17(1) |
| O13 | 40(1) | 37(1) | 42(1) | 8(1)   | -16(1) | -13(1) |
| O14 | 29(1) | 36(1) | 40(1) | 0(1)   | -4(1)  | -10(1) |
| O15 | 35(1) | 34(1) | 40(1) | -3(1)  | -6(1)  | -16(1) |
| O16 | 46(2) | 39(1) | 36(1) | 4(1)   | -8(1)  | -9(1)  |
| C65 | 40(2) | 40(2) | 52(2) | -15(2) | -14(2) | -2(2)  |
| C66 | 43(2) | 29(2) | 58(2) | -11(1) | -20(2) | -6(2)  |
| C67 | 40(2) | 28(2) | 64(2) | 10(2)  | -18(2) | -14(2) |
| C68 | 37(2) | 38(2) | 59(2) | 17(2)  | -21(2) | -13(2) |
| C69 | 38(2) | 55(2) | 31(2) | 7(1)   | -10(1) | -22(2) |
| C70 | 34(2) | 56(2) | 35(2) | -3(1)  | -5(2)  | -19(2) |
| C71 | 29(2) | 33(2) | 43(2) | -13(1) | -8(1)  | -2(1)  |
| C72 | 36(2) | 29(2) | 45(2) | -6(1)  | -14(2) | -6(1)  |
| C73 | 37(2) | 33(2) | 50(2) | 4(1)   | -11(2) | -17(2) |
| C74 | 38(2) | 32(2) | 48(2) | 10(1)  | -9(2)  | -10(2) |
| C75 | 55(2) | 52(2) | 32(2) | 0(2)   | -3(2)  | -13(2) |
| C76 | 48(2) | 57(2) | 34(2) | -6(2)  | 1(2)   | -15(2) |
| O17 | 43(1) | 39(1) | 29(1) | -1(1)  | -9(1)  | -11(1) |



Supplementary Material (ESI) for Organic & Biomolecular Chemistry  
This journal is (c) The Royal Society of Chemistry 2009

|     |        |        |        |        |        |        |
|-----|--------|--------|--------|--------|--------|--------|
| O18 | 43(2)  | 32(1)  | 55(1)  | -2(1)  | -12(1) | -11(1) |
| O19 | 31(1)  | 46(1)  | 50(1)  | 8(1)   | -10(1) | -16(1) |
| O20 | 41(1)  | 47(1)  | 33(1)  | 0(1)   | -9(1)  | -8(1)  |
| O21 | 37(1)  | 33(1)  | 43(1)  | -9(1)  | -9(1)  | -4(1)  |
| O22 | 30(1)  | 38(1)  | 42(1)  | 0(1)   | -6(1)  | -10(1) |
| C77 | 49(2)  | 48(2)  | 47(2)  | -16(2) | -13(2) | -9(2)  |
| C78 | 53(2)  | 34(2)  | 53(2)  | -16(2) | -11(2) | -7(2)  |
| C79 | 60(3)  | 32(2)  | 68(2)  | 1(2)   | -21(2) | -17(2) |
| C80 | 53(2)  | 40(2)  | 65(2)  | 12(2)  | -25(2) | -29(2) |
| C81 | 33(2)  | 66(2)  | 48(2)  | 16(2)  | -5(2)  | -20(2) |
| C82 | 38(2)  | 65(2)  | 35(2)  | 9(2)   | -5(2)  | -14(2) |
| C83 | 42(2)  | 50(2)  | 36(2)  | -15(2) | -9(2)  | -1(2)  |
| C84 | 40(2)  | 44(2)  | 42(2)  | -14(2) | -12(2) | 0(2)   |
| C85 | 35(2)  | 28(2)  | 56(2)  | -9(1)  | -13(2) | -6(1)  |
| C86 | 32(2)  | 27(2)  | 58(2)  | 5(1)   | -12(2) | -10(1) |
| C87 | 39(2)  | 41(2)  | 38(2)  | 8(1)   | -1(2)  | -9(2)  |
| C88 | 39(2)  | 45(2)  | 34(2)  | 5(1)   | -9(2)  | -4(2)  |
| C89 | 63(4)  | 141(6) | 105(4) | -23(4) | 5(3)   | -6(4)  |
| S1  | 69(1)  | 52(1)  | 43(1)  | 5(1)   | -14(1) | -21(1) |
| O23 | 132(6) | 61(4)  | 59(4)  | 9(3)   | -26(4) | -52(4) |

---

**Table S5.** Hydrogen coordinates [ $\times 10^4$ ] and isotropic displacement parameters [ $\text{\AA}^2 \times 10^3$ ].

| Atom | <i>x</i> | <i>y</i> | <i>z</i> | <i>U</i> <sub>eq</sub> | <i>S.o.f.</i> |
|------|----------|----------|----------|------------------------|---------------|
| H1   | 1335     | 2814     | 4360     | 39                     | 1             |
| H2   | 3267     | 3612     | 2980     | 32                     | 1             |
| H3   | 4482     | 4382     | 2479     | 34                     | 1             |
| H4   | 5213     | 4093     | 1735     | 37                     | 1             |
| H5   | 5337     | 2905     | 1172     | 35                     | 1             |
| H6   | 4399     | 2071     | 927      | 38                     | 1             |
| H1A  | 1586     | -511     | 4781     | 68                     | 1             |
| H1B  | 2076     | -1089    | 4286     | 68                     | 1             |
| H1C  | 759      | -703     | 4480     | 68                     | 1             |
| H2A  | 2138     | 570      | 4147     | 48                     | 1             |
| H2B  | 1376     | 344      | 3821     | 48                     | 1             |
| H3A  | 536      | 1357     | 4723     | 40                     | 1             |
| H3B  | -251     | 1076     | 4431     | 40                     | 1             |
| H4A  | 270      | 2136     | 3761     | 42                     | 1             |
| H4B  | -411     | 2705     | 4245     | 42                     | 1             |
| H7   | 2889     | 3305     | 4437     | 35                     | 1             |
| H9   | 4780     | 4078     | 4484     | 41                     | 1             |
| H10  | 6172     | 4664     | 3981     | 43                     | 1             |
| H11  | 6363     | 4780     | 3121     | 40                     | 1             |
| H16  | 7608     | 4874     | 1447     | 38                     | 1             |
| H17  | 8920     | 4647     | 707      | 47                     | 1             |
| H18  | 8832     | 3701     | 98       | 48                     | 1             |
| H21  | 7474     | 2494     | -116     | 44                     | 1             |
| H24A | 3518     | 990      | 835      | 46                     | 1             |
| H24B | 4513     | 549      | 391      | 46                     | 1             |
| H25A | 2838     | 1232     | 96       | 44                     | 1             |
| H25B | 3710     | 1811     | -148     | 44                     | 1             |
| H26A | 1893     | 2513     | 659      | 50                     | 1             |
| H26B | 2760     | 3094     | 410      | 50                     | 1             |
| H27A | 2076     | 3284     | -328     | 79                     | 1             |
| H27B | 1091     | 3753     | 114      | 79                     | 1             |
| H27C | 1200     | 2713     | -75      | 79                     | 1             |
| H7A  | 10392    | 7019     | 4031     | 36                     | 1             |
| H8   | 9623     | 8577     | 3899     | 32                     | 1             |
| H9A  | 9909     | 10084    | 3467     | 36                     | 1             |
| H10A | 10658    | 10156    | 2707     | 35                     | 1             |
| H11A | 11924    | 9051     | 2176     | 32                     | 1             |
| H12  | 14047    | 8027     | 777      | 40                     | 1             |
| H28A | 12668    | 6720     | 5241     | 91                     | 1             |
| H28B | 13705    | 6700     | 4803     | 91                     | 1             |
| H28C | 13531    | 5703     | 5058     | 91                     | 1             |
| H29A | 12031    | 7000     | 4494     | 52                     | 1             |
| H29B | 12941    | 6025     | 4284     | 52                     | 1             |
| H30A | 11110    | 6051     | 5085     | 41                     | 1             |
| H30B | 12012    | 5079     | 4867     | 41                     | 1             |
| H31A | 11355    | 5422     | 4113     | 39                     | 1             |
| H31B | 10384    | 5306     | 4560     | 39                     | 1             |
| H34  | 7110     | 8515     | 5024     | 39                     | 1             |
| H36  | 5879     | 10637    | 4921     | 43                     | 1             |
| H37  | 6006     | 12036    | 4440     | 44                     | 1             |
| H38  | 7497     | 11997    | 3776     | 40                     | 1             |
| H43  | 8885     | 12038    | 2083     | 36                     | 1             |
| H44  | 9178     | 12312    | 1229     | 43                     | 1             |
| H45  | 10634    | 11268    | 707      | 44                     | 1             |

Supplementary Material (ESI) for Organic & Biomolecular Chemistry  
This journal is (c) The Royal Society of Chemistry 2009

|      |       |      |      |    |   |
|------|-------|------|------|----|---|
| H48  | 12524 | 9422 | 720  | 38 | 1 |
| H51A | 15086 | 6418 | 1324 | 42 | 1 |
| H51B | 15742 | 6837 | 842  | 42 | 1 |
| H52A | 14672 | 6319 | 370  | 45 | 1 |
| H52B | 15498 | 5437 | 616  | 45 | 1 |
| H53A | 13147 | 6147 | 996  | 49 | 1 |
| H53B | 13976 | 5260 | 1240 | 49 | 1 |
| H54A | 13378 | 5233 | 317  | 69 | 1 |
| H54B | 13104 | 4569 | 790  | 69 | 1 |
| H54C | 14357 | 4379 | 493  | 69 | 1 |
| H14A | 5077  | -911 | 2334 | 49 | 1 |
| H14B | 5058  | -507 | 2801 | 49 | 1 |
| H14C | 5481  | -54  | 2331 | 49 | 1 |
| H13  | 2407  | 2626 | 2510 | 33 | 1 |
| H57A | 2514  | 1858 | 1654 | 36 | 1 |
| H57B | 1969  | 1498 | 2179 | 36 | 1 |
| H58A | 3564  | 244  | 1778 | 34 | 1 |
| H58B | 4339  | 913  | 1798 | 34 | 1 |
| H59A | 3647  | 852  | 2705 | 40 | 1 |
| H59B | 3263  | -54  | 2609 | 40 | 1 |
| H16A | 9524  | 5584 | 2650 | 47 | 1 |
| H16B | 9663  | 6110 | 2170 | 47 | 1 |
| H16C | 9299  | 6656 | 2626 | 47 | 1 |
| H15  | 12469 | 7317 | 2530 | 36 | 1 |
| H62A | 12338 | 6164 | 3353 | 36 | 1 |
| H62B | 12839 | 5779 | 2812 | 36 | 1 |
| H63A | 11188 | 5307 | 3176 | 38 | 1 |
| H63B | 10481 | 6431 | 3214 | 38 | 1 |
| H64A | 11175 | 6500 | 2304 | 44 | 1 |
| H64B | 11407 | 5345 | 2349 | 44 | 1 |
| H65A | 1339  | 4194 | 1690 | 53 | 1 |
| H65B | 807   | 3900 | 1285 | 53 | 1 |
| H66A | -810  | 3877 | 1913 | 51 | 1 |
| H66B | 297   | 3046 | 1995 | 51 | 1 |
| H67A | -418  | 2968 | 2869 | 51 | 1 |
| H67B | -1548 | 3746 | 2770 | 51 | 1 |
| H68A | -1357 | 3786 | 3592 | 53 | 1 |
| H68B | -224  | 4070 | 3397 | 53 | 1 |
| H69A | -1011 | 5598 | 3819 | 48 | 1 |
| H69B | -2129 | 5295 | 4029 | 48 | 1 |
| H70A | -3123 | 6710 | 3598 | 49 | 1 |
| H70B | -2634 | 6989 | 4023 | 49 | 1 |
| H71A | -2616 | 8532 | 3577 | 43 | 1 |
| H71B | -3036 | 8236 | 3134 | 43 | 1 |
| H72A | -1968 | 9375 | 2877 | 44 | 1 |
| H72B | -906  | 8567 | 3022 | 44 | 1 |
| H73A | 183   | 8373 | 2186 | 46 | 1 |
| H73B | -787  | 9328 | 2085 | 46 | 1 |
| H74A | -1171 | 8467 | 1491 | 49 | 1 |
| H74B | 59    | 8584 | 1343 | 49 | 1 |
| H75A | 474   | 7137 | 844  | 58 | 1 |
| H75B | -692  | 6922 | 1069 | 58 | 1 |
| H76A | 778   | 5455 | 828  | 57 | 1 |
| H76B | 1411  | 5641 | 1223 | 57 | 1 |
| H77A | 7178  | 8053 | 1040 | 57 | 1 |
| H77B | 5863  | 8419 | 1258 | 57 | 1 |
| H78A | 6737  | 6807 | 1577 | 56 | 1 |
| H78B | 7446  | 7281 | 1829 | 56 | 1 |
| H79A | 6441  | 6573 | 2586 | 62 | 1 |

Supplementary Material (ESI) for Organic & Biomolecular Chemistry  
This journal is (c) The Royal Society of Chemistry 2009

|      |      |       |      |     |   |
|------|------|-------|------|-----|---|
| H79B | 5613 | 6335  | 2298 | 62  | 1 |
| H80A | 4104 | 7565  | 2769 | 58  | 1 |
| H80B | 4630 | 6625  | 3089 | 58  | 1 |
| H81A | 4038 | 7618  | 3821 | 60  | 1 |
| H81B | 3484 | 8526  | 3489 | 60  | 1 |
| H82A | 3973 | 9051  | 4174 | 57  | 1 |
| H82B | 5256 | 8488  | 3966 | 57  | 1 |
| H83A | 5791 | 10018 | 3823 | 53  | 1 |
| H83B | 4537 | 10542 | 4089 | 53  | 1 |
| H84A | 4258 | 11517 | 3360 | 52  | 1 |
| H84B | 5209 | 11711 | 3586 | 52  | 1 |
| H85A | 6130 | 12224 | 2826 | 47  | 1 |
| H85B | 5157 | 12129 | 2581 | 47  | 1 |
| H86A | 6861 | 12025 | 1997 | 47  | 1 |
| H86B | 7446 | 11044 | 2274 | 47  | 1 |
| H87A | 7850 | 10283 | 1521 | 50  | 1 |
| H87B | 7110 | 11176 | 1239 | 50  | 1 |
| H88A | 5960 | 10199 | 1160 | 50  | 1 |
| H88B | 7230 | 9696  | 904  | 50  | 1 |
| H89A | 8946 | 389   | -208 | 166 | 1 |
| H89B | 8969 | 1063  | 204  | 166 | 1 |
| H89C | 8208 | 346   | 327  | 166 | 1 |

---

**Table S6.** Hydrogen bonds [ $\text{\AA}$  and  $^\circ$ ].

| $D-H\cdots A$                | $d(D-H)$ | $d(H\cdots A)$ | $d(D\cdots A)$ | $\angle(DHA)$ |
|------------------------------|----------|----------------|----------------|---------------|
| N13–H13...O1                 | 0.86     | 2.01           | 2.860(3)       | 168.7         |
| N15–H15...O6                 | 0.86     | 2.03           | 2.885(3)       | 170.1         |
| N2–H2...O7                   | 0.86     | 2.04           | 2.866(4)       | 159.8         |
| N3–H3...O7                   | 0.86     | 2.01           | 2.782(3)       | 148.2         |
| N4–H4...O7                   | 0.86     | 2.43           | 3.163(3)       | 143.5         |
| N5–H5...O8                   | 0.86     | 1.84           | 2.677(3)       | 163.2         |
| N6–H6...O8                   | 0.86     | 1.98           | 2.840(3)       | 174.7         |
| N7–H7A...O10                 | 0.86     | 2.01           | 2.846(3)       | 164.7         |
| N8–H8...O10                  | 0.86     | 1.84           | 2.688(3)       | 167.5         |
| N9–H9A...O9                  | 0.86     | 2.62           | 3.291(3)       | 135.6         |
| N10–H10A...O9                | 0.86     | 1.95           | 2.767(3)       | 158.7         |
| N11–H11A...O9                | 0.86     | 1.95           | 2.775(3)       | 160.6         |
| N1–H1...O4 <sup>ii</sup>     | 0.86     | 2.05           | 2.893(4)       | 167.1         |
| N12–H12...O3 <sup>iii</sup>  | 0.86     | 2.08           | 2.916(4)       | 165.4         |
| N14–H14A...O18 <sup>iv</sup> | 0.89     | 2.03           | 2.872(4)       | 157.6         |
| N14–H14B...O20 <sup>iv</sup> | 0.89     | 2.04           | 2.875(4)       | 154.9         |
| N14–H14B...O19 <sup>iv</sup> | 0.89     | 2.52           | 3.073(4)       | 120.9         |
| N14–H14C...O22 <sup>iv</sup> | 0.89     | 2.07           | 2.940(3)       | 166.1         |
| N14–H14C...O17 <sup>iv</sup> | 0.89     | 2.56           | 3.016(3)       | 112.7         |
| N16–H16A...O12 <sup>v</sup>  | 0.89     | 2.06           | 2.738(4)       | 132.1         |
| N16–H16A...O13 <sup>v</sup>  | 0.89     | 2.19           | 2.966(3)       | 144.8         |
| N16–H16B...O11 <sup>v</sup>  | 0.89     | 2.14           | 2.919(4)       | 145.2         |
| N16–H16B...O16 <sup>v</sup>  | 0.89     | 2.23           | 2.852(3)       | 126.5         |
| N16–H16C...O15 <sup>v</sup>  | 0.89     | 2.20           | 2.935(4)       | 140.1         |
| N16–H16C...O14 <sup>v</sup>  | 0.89     | 2.20           | 2.932(3)       | 139.6         |

Symmetry transformations used to generate equivalent atoms:

- (i)  $-x+2, -y, -z$  (ii)  $-x+1, -y+1, -z+1$  (iii)  $-x+2, -y+1, -z$   
 (iv)  $x, y-1, z$  (v)  $x+1, y, z$

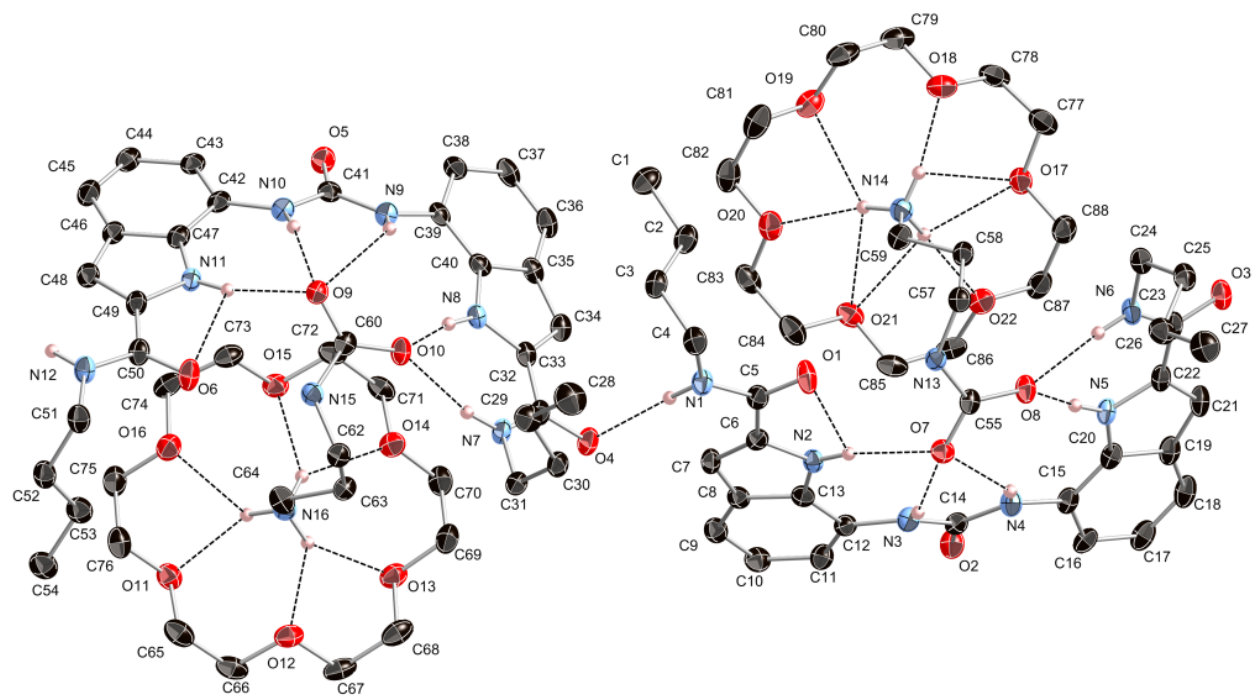

Figure S58 ORTEP view of the structure (thermal ellipsoids at the 30% probability level)

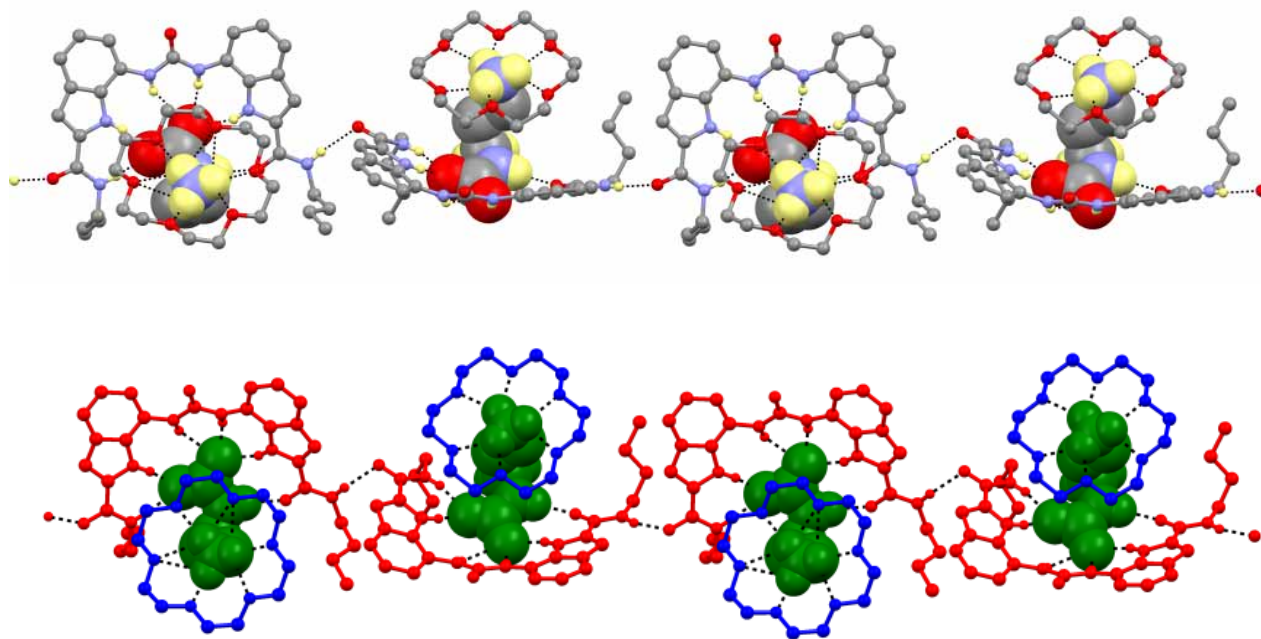

Figure S59 Views of the hydrogen bonding interactions between complexes in the solid state. The AAAC salt is shown in a spacefilling representation.

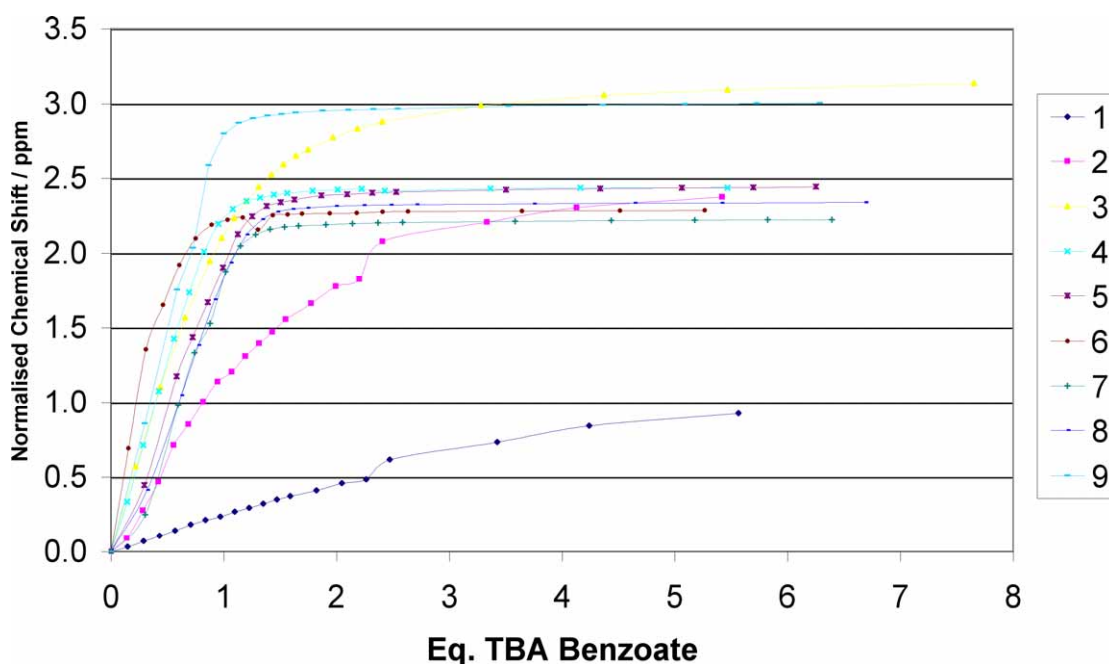

Figure S60 NMR titrations with TBA benzoate in DMSO- $d_6$ /0.5% water.

Table S7: correlation between chemical shift of urea NH protons in the presence of one equivalent of benzoate vs. stability constant.

| Receptor                                     | $K_a/M^{-1}$ | $\Delta\delta/ppm$ |
|----------------------------------------------|--------------|--------------------|
| 1 Butyl-Hexyl                                | 17           | 0.25               |
| 2 Butyl-Phenyl                               | 140          | 1.20               |
| 3 Phenyl-Phenyl                              | 674          | 2.10               |
| <b>Average shift for low affinity group</b>  |              | <b>1.2</b>         |
| 5 Phenyl-Carbazoyl                           | 3400         | 1.85               |
| 7 Indole-Carbazoyl                           | 5880         | 1.70               |
| 8 Carbazoyl-Carbazoyl                        | 5670         | 1.70               |
| <b>Average shift for mid-affinity group</b>  |              | <b>1.75</b>        |
| 6 Indole-indole                              | 10000        | 2.22               |
| 4 Phenyl-Indole                              | 13000        | 2.25               |
| 9 Butyl appended bisindole                   | 23000        | 2.70               |
| <b>Average shift for high affinity group</b> |              | <b>2.4</b>         |
